# Supplementary material for: Advancing interpretation of incoherent scattering in ice penetrating radar data used for ice core site selection
Source: Copernicus journal article supplement (doi:10.5194/egusphere-2024-2450), 2024-09-02
Supplement: Supplementary file 1 [file SupplementaryInformation.pdf › SupplementaryInformation.pdf]

1 **Supplement to: Advancing interpretation of incoherent scattering in**  
2 **ice penetrating radar data used for ice core site selection**

3  
4 Ellen Mutter<sup>1</sup> and Nicholas Holschuh<sup>2</sup>

5 <sup>1</sup>Department of Earth and Atmospheric Sciences, Cornell University, Ithaca, NY, 14853, USA

6 <sup>2</sup>Department of Geology, Amherst College, Amherst, MA 01002, USA

7 *Correspondence to:* Nicholas Holschuh ([nholschuh@amherst.edu](mailto:nholschuh@amherst.edu))

8 Below, we provide four supplementary figures that provide the broader context that further justify interpretations of the radar  
9 data in the main text. Here, we also include the reference list for Supplementary Tables 1 and 2.

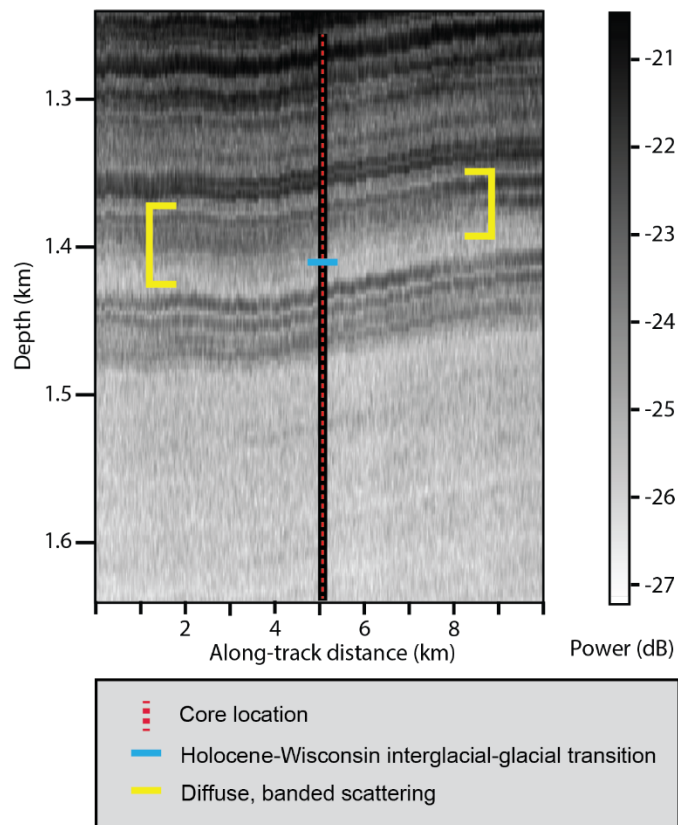

10

11 **Figure S1: NEEM radargram from depths spanning the Holocene-Wisconsin Interglacial-Glacial transition at 1419 m.**  
12 **The climactic transition is coincident with a transition from a weak vertical girdle c-axis fabric to a strong single**  
13 **maximum c-axis fabric and is collocated with a band of diffuse scattering in the radargram.**

14

15

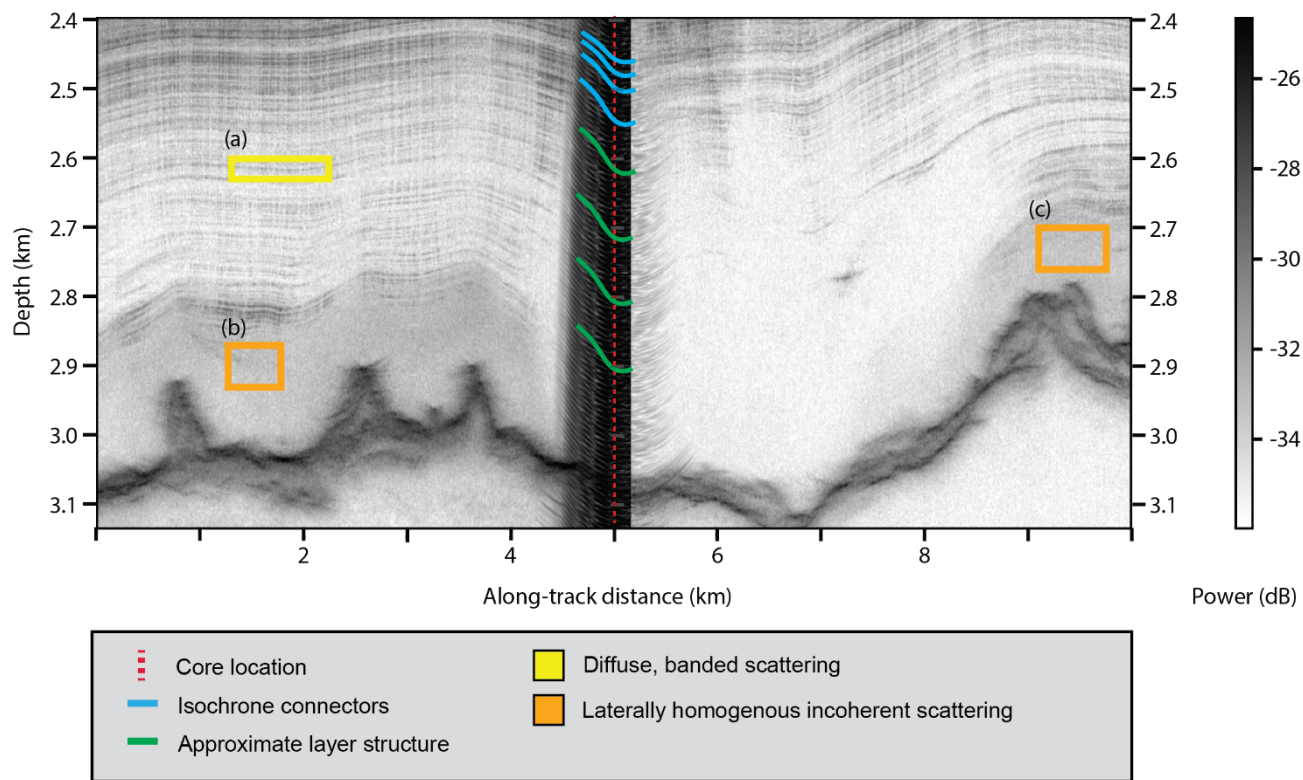

16

17 **Figure S2: Dome Fuji radargram with layer tracing across borehole (strong scattering at the ice drill core site is caused**  
18 **by borehole fluid in the ice core cavity). Examples of diffuse banded scattering (a) and laterally homogeneous**  
19 **incoherent scattering (b,c). The diffuse banded layer at (a) dips to ~2700 m at the core site and the onset of the**  
20 **homogenous incoherent scattering unit at (b) dips to ~2900 m at the core site.**

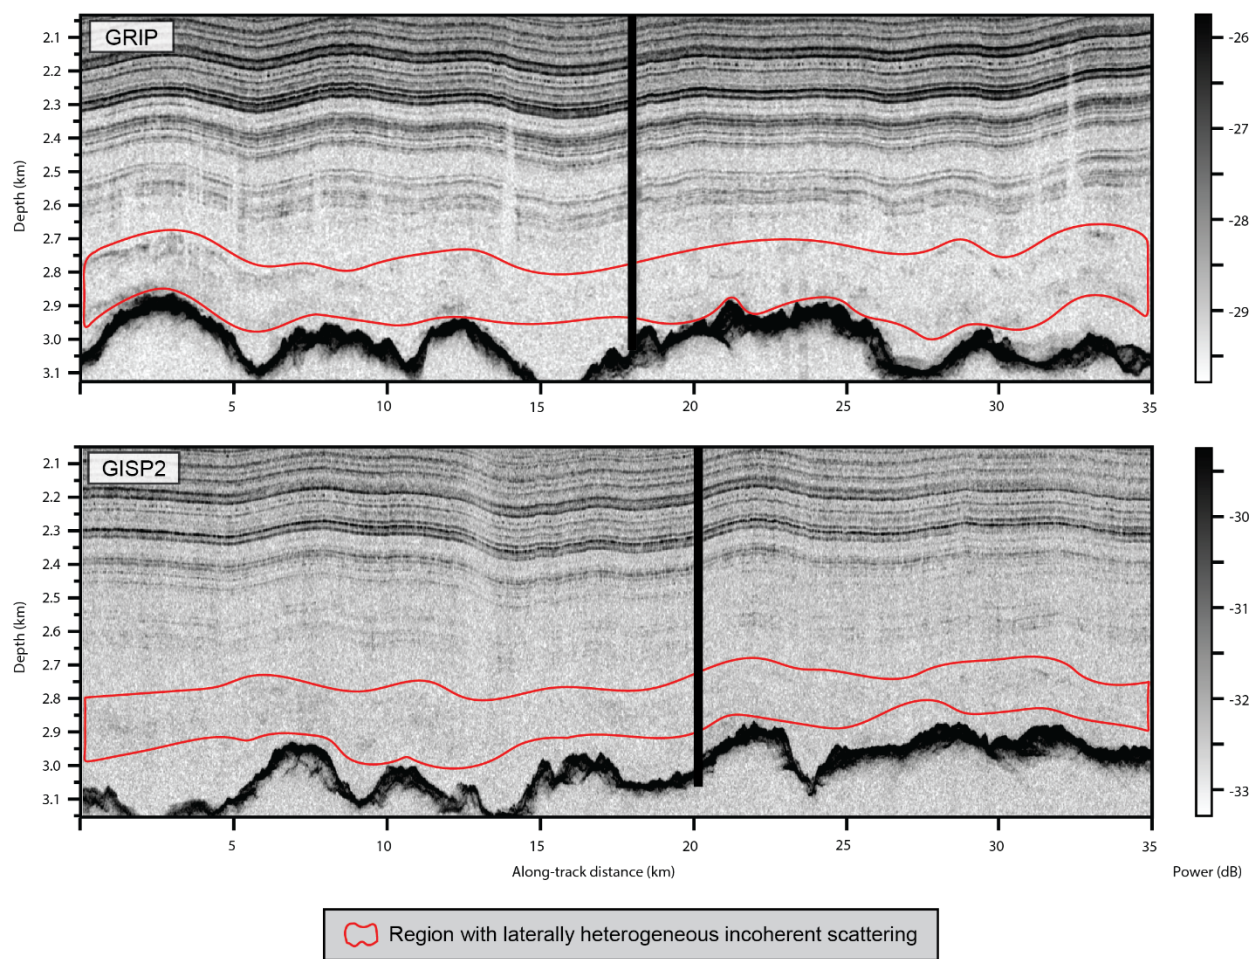

23 **Figure S3: 35 km length radar transects from GRIP and GISP2. Areas of laterally heterogeneous incoherent scattering**  
24 **are outlined in red. Black vertical line depicts location of ice core. The region of laterally heterogeneous incoherent**  
25 **scattering is coincident with the approximate depth of the disturbed climate records at GRIP and GISP2.**

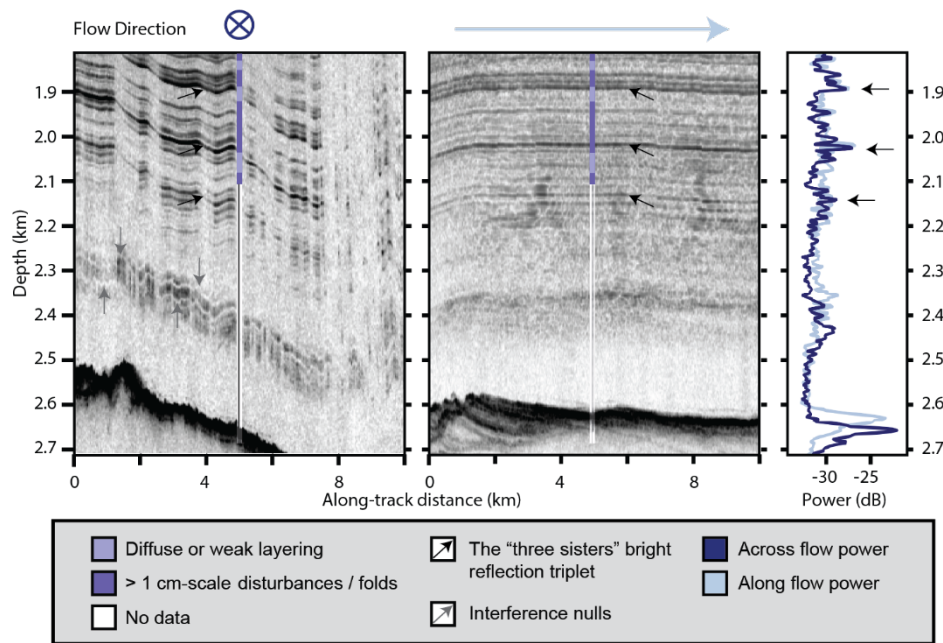

27

28 **Figure S4: Across (left) and along (right) flow radar transects from near the EastGRIP ice core. Vertical colormap over**  
 29 **the ice core drill site visualizes depths of transitions between diffuse/weak layering and layers with periodic cm-scale**  
 30 **scale disturbances. Transitions between these layer types at 1900 m and 2030 m are roughly coincident with two of the**  
 31 **“three sisters” bright reflection horizons while the third reflection “sister” is below the depths of published linescan**  
 32 **images. Interference nulls are observed within the incoherent scattering unit in the across flow radargram but are**  
 33 **absent from the along flow radargram.**

## 34     **References in Supplementary Material**

- 35     Ahn, J. and Brook, E. J.: Atmospheric CO<sub>2</sub> and climate on millennial time scales during the Last Glacial Period, *Science*, 322,  
36     83–85, <https://doi.org/10.1126/science.1160832>, 2008.
- 37     Alley, R. B., Gow, A. J., Johnsen, S. J., Kipfstuhl, J., Meese, D. A., and Thorsteinsson, T.: Comparison of deep ice cores,  
38     *Nature*, 373, 393–394, <https://doi.org/10.1038/373393b0>, 1995.
- 39     Alley, R. B., Gow, A. J., Meese, D. A., Fitzpatrick, J. J., Waddington, E. D., and Bolzan, J. F.: Grain-scale processes, folding,  
40     and stratigraphic disturbance in the GISP2 ice core, *J. Geophys. Res. Oceans*, 102, 26819–26830,  
41     <https://doi.org/10.1029/96JC03836>, 1997.
- 42     Blankenship, D.D., Morse, D. L., Finn, C. A., Bell, R. E., Peter, M. E., Kempf S. D., Hodge, S. M., Studinger, M., Behrendt,  
43     J. C., and Brozena, J. M.: Geologic controls on the initiation of rapid basal motion for the ice streams of the Southeastern Ross  
44     Embayment: a geophysical perspective including new airborne radar sounding and laser altimetry measurements, in: *The West*  
45     *Antarctic Ice Sheet: Behavior and Environment*, edited by Alley, R. B., and Bindshadler, R. A., *Antarct. Res. Ser.*, 77, Amer.  
46     Geophys. Union, Washington, DC, 105-121, 2001.
- 47     Brook, E. J., White, J. W. C., Schilla, A. S. M., Bender, M. L., Barnett, B., Severinghaus, J. P., Taylor, K. C., Alley, R. B.,  
48     and Steig, E. J.: Timing of millennial-scale climate change at Siple Dome, West Antarctica, during the last glacial period,  
49     *Quat. Sci. Rev.*, 24, 1333–1343, <https://doi.org/10.1016/j.quascirev.2005.02.002>, 2005.
- 50     Buizert, C., Cuffey, K. M., Severinghaus, J. P., Baggenstos, D., Fudge, T. J., Steig, E. J., Markle, B. R., Winstrup, M., Rhodes,  
51     R. H., Brook, E. J., Sowers, T. A., Clow, G. D., Cheng, H., Edwards, R. L., Sigl, M., McConnell, J. R., and Taylor, K. C.: The  
52     WAIS Divide deep ice core WD2014 chronology – Part 1: Methane synchronization (68–31 ka BP) and the gas age–ice age  
53     difference, *Clim. Past*, 11, 153–173, <https://doi.org/10.5194/cp-11-153-2015>, 2015.
- 54     Buizert, C., Sower, T. A., Niezgod, K., Blunier, T., Gkinis, V., Harlan, M., He, C., Jones, T., Kjaer, H., Liisberg, J., Menking,  
55     J., Morris, V., Noone, D., Rasmussen, S. O., Sime, L. C., Steffensen, J. P., Svensson, A., Vaughn B., Vinther, B. M., White,  
56     J. W. C.: The Greenland spatial fingerprint of Dansgaard-Oeschger events in observations and models, *Proc. Natl. Acad. Sci.*,  
57     121 (44), <https://doi.org/10.1073/pnas.2402637121>, 2024.
- 58     Capron, E., Landais, A., Lemieux-Dudon, B., Schilt, A., Masson-Delmotte, V., Buiron, D., Chappellaz, J., Dahl-Jensen, D.,  
59     Johnsen, S., Leuenberger, M., Loulergue, L., and Oerter, H.: Synchronising EDML and NorthGRIP ice cores using  $\delta^{18}\text{O}$  of  
60     atmospheric oxygen ( $\delta^{18}\text{O}_{\text{atm}}$ ) and CH<sub>4</sub> measurements over MIS5 (80–123 kyr), *Quat. Sci. Rev.*, 29, 222–234,  
61     <https://doi.org/10.1016/j.quascirev.2009.07.014>, 2010.
- 62     Casey, K. A., Fudge, T. J., Neumann, T. A., Steig, E. J., Cavitte, M. G. P., and Blankenship, D. D.: The 1500 m South Pole  
63     ice core: recovering a 40 ka environmental record, *Ann. Glaciol.*, 55, 137–146, <https://doi.org/10.3189/2014AoG68A016>,  
64     2014.
- 65     CRISIS: Radar Depth Sounder Data [data set], 2024.
- 66     Dahl-Jensen, D., Gundestrup, N. S., Miller, H., Watanabe, O., Johnsen, S. J., Steffensen, J. P., Clausen, H. B., Svensson, A.,  
67     and Larsen, L. B.: The NorthGRIP deep drilling programme, *Ann. Glaciol.*, 35, 1–4,  
68     <https://doi.org/10.3189/172756402781817275>, 2002.
- 69     Dansgaard, W.: A New Greenland Deep Ice Core, *Science*, 218, 1273–1277, 1982.

70 Dome Fuji Ice Core Project Members: State dependence of climatic instability over the past 720,000 years from Antarctic ice  
71 cores and climate modeling, *Sci. Adv.*, 3, <https://doi.org/10.1126/sciadv.1600446>, 2017.

72 Durand, G., Svensson, A., Persson, A., Gillet-Chaulc, F., Montagnat, M., and Dahl-Jensen, D.: Evolution of the texture along  
73 the EPICA Dome C ice core, *Low Temperature Science Supplement Issue: Physics of Ice Core Records II*, 68, 91–105, 2009.

74 Eichler, J.: C-axis analysis of the NEEM ice core, Master’s Thesis, Freie Universitat, Berlin, Germany, 63 pp., 2013.

75 Eisen, O., Hamann, I., Kipfstuhl, S., Steinhage, D., and Wilhelms, F.: Direct evidence for continuous radar reflector originating  
76 from changes in crystal-orientation fabric, *The Cryosphere*, 1, 1–10, <https://doi.org/10.5194/tc-1-1-2007>, 2007.

77 Engelhardt, H.: Ice temperature and high geothermal flux at Siple Dome, West Antarctica, from borehole measurements, *J.*  
78 *Glaciol.*, 50, 251–256, <https://doi.org/10.3189/172756504781830105>, 2004.

79 EPICA community members: Eight glacial cycles from an Antarctic ice core, *Nature*, 429, 623–628,  
80 <https://doi.org/10.1038/nature02599>, 2004.

81 Epifanio, J. A., Brook, E. J., Buizert, C., Edwards, J. S., Sowers, T. A., Kahle, E. C., Severinghaus, J. P., Steig, E. J., Winski,  
82 D. A., Osterberg, E. C., Fudge, T. J., Aydin, M., Hood, E., Kalk, M., Kreutz, K. J., Ferris, D. G., and Kennedy, J. A.: The SP19  
83 chronology for the South Pole Ice Core – Part 2: gas chronology,  $\Delta$ age, and smoothing of atmospheric records, *Clim. Past*, 16,  
84 2431–2444, <https://doi.org/10.5194/cp-16-2431-2020>, 2020.

85 Faria, S. H., Freitag, J., and Kipfstuhl, S.: Polar ice structure and the integrity of ice-core paleoclimate records, *Quat. Sci. Rev.*,  
86 29, 338–351, <https://doi.org/10.1016/j.quascirev.2009.10.016>, 2010.

87 Faria, S. H., Kipfstuhl, S., and Lambrecht, A.: The EPICA-DML Deep Ice Core: A Visual Record, Springer Berlin Heidelberg,  
88 Berlin, Heidelberg, 305 pp., <https://doi.org/10.1007/978-3-662-55308-4>, 2018.

89 Fegyveresi, J. M., Fudge, T. J., Ferris, D. G., Winski, D. A., and Alley, R. B.: Visual observations and stratigraphy of the  
90 South Pole Ice Core (SPICEcore): a preliminary Holocene (~10.2 ka) accumulation record and depth-age chronology, *Cold*  
91 *Regions Research and Engineering Laboratory*, 2019.

92 Ferraccioli, F., Forsberg, R., Matsuoka, K., Olesen, A. V., Jordan, T., Corr, H., Robinson, C., and Kohler, J.: Processed  
93 Airborne Radio-Echo Sounding Data from the POLARGAP Survey Covering the South Pole, and Foundation and Recovery  
94 Glaciers, East Antarctica [data set], <https://doi.org/10.5285/e8a29fa7-a245-4a04-8b56-098defa134b9>, 2021a.

95 Ferraccioli, F., Corr, H., Jordan, T., Robinson, C., Armadillo, E., Bozzo, E., and Caneva, G.: Processed Airborne Radio-Echo  
96 Sounding Data from the WISE-ISODYN Survey Across the Wilkes Subglacial Basin, East Antarctica (2005/2006) [data set],  
97 <https://doi.org/10.5285/70adab3d-3632-400d-9aa1-ddf2d62a11b3>, 2021b.

98 Fitzpatrick, J. J., Voigt, D. E., Fegyveresi, J. M., Stevens, N. T., Spencer, M. K., Cole-Dai, J., Alley, R. B., Jardine, G. E.,  
99 Cravens, E. D., Wilen, L. A., Fudge, T. J., and McConnell, J. R.: Physical properties of the WAIS Divide ice core, *J. Glaciol.*,  
100 60, 1181–1198, <https://doi.org/10.3189/2014JoG14J100>, 2014.

101 Fudge, T. J., Taylor, K. C., Waddington, E. D., Fitzpatrick, J. J., and Conway, H.: Electrical stratigraphy of the WAIS Divide  
102 ice core: identification of centimeter-scale irregular layering, *J. Geophys. Res. Earth Surf.*, 121, 1218–1229,  
103 <https://doi.org/10.1002/2016JF003845>, 2016.

104 Gow, A. J. and Meese, D.: Physical properties, crystalline textures and c-axis fabrics of the Siple Dome (Antarctica) ice core,  
105 *J. Glaciol.*, 53, 573–584, <https://doi.org/10.3189/002214307784409252>, 2007.

106 Gow, A. J. and Meese, D. A.: The Physical and Structural Properties of the Siple Dome Ice Cores [data set],  
 107 <https://doi.org/10.7265/N5668B34>, 2003.

108 Gow, A. J. and Williamson, T.: Rheological implications of the internal structure and crystal fabrics of the West Antarctic ice  
 109 sheet as revealed by deep core drilling at Byrd Station, *Geol Soc America Bull*, 87, 1665, [https://doi.org/10.1130/0016-](https://doi.org/10.1130/0016-7606(1976)87<1665:RIOTIS>2.0.CO;2)  
 110 [7606\(1976\)87<1665:RIOTIS>2.0.CO;2](https://doi.org/10.1130/0016-7606(1976)87<1665:RIOTIS>2.0.CO;2), 1976.

111 Gow, A. J., Ueda, H. T., and Garfield, D. E.: Antarctic ice sheet: preliminary results of first core hole to bedrock, *Science*,  
 112 161, 1011–1013, <https://doi.org/10.1126/science.161.3845.1011>, 1968.

113 Gow, A. J., Epstein, S., and Sheehy, W.: On the origin of stratified debris in ice cores from the bottom of the Antarctic Ice  
 114 Sheet, *J. Glaciol.*, 23, 185–192, <https://doi.org/10.3189/S0022143000029828>, 1979.

115 Gow, A. J., Meese, D. A., Alley, R. B., Fitzpatrick, J. J., Anandakrishnan, S., Woods, G. A., and Elder, B. C.: Physical and  
 116 structural properties of the Greenland Ice Sheet Project 2 ice core: A review, *J. Geophys. Res.*, 102, 26559–26575,  
 117 <https://doi.org/10.1029/97JC00165>, 1997.

118 Grootes, P. M., Steig, E., and Minze, S.: Taylor Ice Dome study 1993-1994: an ice core to bedrock, *Antarct. J.*, 79–81, 1994.

119 Hansen, B. L. and Langway, C. C.: Deep core drilling in ice and core analysis at Camp Century, Greenland, 1961-1966,  
 120 *Antarct. J.*, 126, 207–208, 1966.

121 Herron, S. L. and Langway, C. C.: A Comparison of Ice Fabrics and Textures at Camp Century, Greenland and Byrd Station,  
 122 *Antarctica, Annals of Glaciology*, 3, 118–124, <https://doi.org/10.3189/S0260305500002639>, 1982.

123 Herron, S. L., Langway Jr., C. C., and Brugger, K. A.: Ultrasonic Velocities and Crystalline Anisotropy in the Ice Core from  
 124 Dye 3, Greenland, in: *Greenland Ice Core: Geophysics, Geochemistry, and the Environment*, American Geophysical Union  
 125 (AGU), 23–31, <https://doi.org/10.1029/GM033p0023>, 1985.

126 Hodge, S. M., Wright, D. L., Bradley, J. A., Jacobel, R. W., Skou, N., and Vaughn, B.: Determination of the surface and bed  
 127 topography in central Greenland, *J. Glaciol.*, 36, 17–30, <https://doi.org/10.3189/S0022143000005505>, 1990.

128 Hvidberg, C. S., Grinsted, A., Dahl-Jensen, D., Khan, S. A., Kusk, A., Andersen, J. K., Neckel, N., Solgaard, A., Karlsson, N.  
 129 B., Kjær, H. A., and Vallengaard, P.: Surface velocity of the Northeast Greenland Ice Stream (NEGIS): assessment of interior  
 130 velocities derived from satellite data by GPS, *The Cryosphere*, 14, 3487–3502, <https://doi.org/10.5194/tc-14-3487-2020>, 2020.

131 Jansen, D., Llorens, M.-G., Westhoff, J., Steinbach, F., Kipfstuhl, S., Bons, P., Grier, A., and Weikusat, I.: Small-scale  
 132 disturbances in the stratigraphy of the NEEM ice core: observations and numerical model simulations, *The Cryosphere*  
 133 *Discussions*, 9, <https://doi.org/10.5194/tcd-9-5817-2015>, 2015.

134 Johnsen, S. J., Clausen, H. B., Dansgaard, W., Fuhrer, K., Gundestrup, N., Hammer, C. U., Iversen, P., Jouzel, J., Stauffer, B.,  
 135 and Steffensen, J. P.: Irregular glacial interstadials recorded in a new Greenland ice core, *Nature*, 359, 311–313,  
 136 <https://doi.org/10.1038/359311a0>, 1992.

137 Johnsen, S. J., Dahl-Jensen, D., Gundestrup, N., Steffensen, J. P., Clausen, H. B., Miller, H., Masson-Delmotte, V.,  
 138 Sveinbjörnsdóttir, A. E., and White, J.: Oxygen isotope and palaeotemperature records from six Greenland ice-core stations:  
 139 Camp Century, Dye-3, GRIP, GISP2, Renland and NorthGRIP, *J. Quat. Sci.*, 16, 299–307, <https://doi.org/10.1002/jqs.622>,  
 140 2001.

141 Jouzel, J., Masson-Delmotte, V., Cattani, O., Dreyfus, G., Falourd, S., Hoffmann, G., Minster, B., Nouet, J., Barnola, J. M.,  
142 Chappellaz, J., Fischer, H., Gallet, J. C., Johnsen, S., Leuenberger, M., Loulergue, L., Luethi, D., Oerter, H., Parrenin, F.,  
143 Raisbeck, G., Raynaud, D., Schilt, A., Schwander, J., Selmo, E., Souchez, R., Spahni, R., Stauffer, B., Steffensen, J. P., Stenni,  
144 B., Stocker, T. F., Tison, J. L., Werner, M., and Wolff, E. W.: Orbital and millennial Antarctic climate variability over the past  
145 800,000 years, *Science*, 317, 793–796, <https://doi.org/10.1126/science.1141038>, 2007.

146 Kennedy, J. H., Pettit, E. C., and Prinzio, C. L. D.: The evolution of crystal fabric in ice sheets and its link to climate history,  
147 *Journal of Glaciology*, 59, 357–373, <https://doi.org/10.3189/2013JoG12J159>, 2013.

148 Langway, C. C., Oeschger, H., and Dansgaard, W.: *Greenland Ice Core: Geophysics, Geochemistry, and the Environment*,  
149 American Geophysical Union, 127 pp., 1985.

150 Langway, C. C., Shoji, H., and Azuma, N.: Crystal size and orientation patterns in the Wisconsin-age ice from Dye 3,  
151 Greenland, *Ann. Glaciol.*, 10, 109–115, <https://doi.org/10.3189/S0260305500004262>, 1988.

152 Lilien, D. A., Steinhage, D., Taylor, D., Parrenin, F., Ritz, C., Mulvaney, R., Martín, C., Yan, J.-B., O'Neill, C., Frezzotti, M.,  
153 Miller, H., Gogineni, P., Dahl-Jensen, D., and Eisen, O.: Brief communication: New radar constraints support presence of ice  
154 older than 1.5 Myr at Little Dome C, *The Cryosphere*, 15, 1881–1888, <https://doi.org/10.5194/tc-15-1881-2021>, 2021.

155 Loulergue, L., Schilt, A., Spahni, R., Masson-Delmotte, V., Blunier, T., Lemieux, B., Barnola, J.-M., Raynaud, D., Stocker,  
156 T. F., and Chappellaz, J.: Orbital and millennial-scale features of atmospheric CH<sub>4</sub> over the past 800,000 years, *Nature*, 453,  
157 383–386, <https://doi.org/10.1038/nature06950>, 2008.

158 Montagnat, M., Buiron, D., Arnaud, L., Broquet, A., Schlitz, P., Jacob, R., and Kipfstuhl, S.: Measurements and numerical  
159 simulation of fabric evolution along the Talos Dome ice core, Antarctica, *Earth and Planetary Science Letters*, 357–358, 168–  
160 178, <https://doi.org/10.1016/j.epsl.2012.09.025>, 2012.

161 Montagnat, M., Azuma, N., Dahl-Jensen, D., Eichler, J., Fujita, S., Gillet-Chaulet, F., Kipfstuhl, S., Samyn, D., Svensson, A.,  
162 and Weikusat, I.: Fabric along the NEEM ice core, Greenland, and its comparison with GRIP and NGRIP ice cores, *The*  
163 *Cryosphere*, 8, 1129–1138, <https://doi.org/10.5194/tc-8-1129-2014>, 2014.

164 Morrison, M.: First GISP2 field season just completed, *Eos, Transactions American Geophysical Union*, 70, 1449–1449,  
165 <https://doi.org/10.1029/89EO00336>, 1989.

166 Morse, D. L.: *Glacier Geophysics at Taylor Dome, Antarctica*, Ph.D. thesis, University of Washington, Seattle, WA, USA,  
167 158 pp., 1997.

168 Narcisi, B., Petit, J. R., and Langone, A.: Last glacial tephra layers in the Talos Dome ice core (peripheral East Antarctic  
169 Plateau), with implications for chronostratigraphic correlations and regional volcanic history, *Quat. Sci. Rev.*, 165, 111–126,  
170 <https://doi.org/10.1016/j.quascirev.2017.04.025>, 2017.

171 NEEM Community Members: Eemian interglacial reconstructed from a Greenland folded ice core, *Nature*, 493, 489–494,  
172 <https://doi.org/10.1038/nature11789>, 2013.

173 Nixdorf, U., Steinhage, D., Meyer, U., Hempel, L., Jenett, M., Wachs, P., and Miller, H.: The newly developed airborne radio-  
174 echo sounding system of the AWI as a glaciological tool, *Ann. Glaciol.*, 29, 231–238,  
175 <https://doi.org/10.3189/172756499781821346>, 1999.

176 North Greenland Ice Core Project Members: High-resolution record of Northern Hemisphere climate extending into the last  
177 interglacial period, *Nature*, 431, 147–151, <https://doi.org/10.1038/nature02805>, 2004.

178 Petit, J. R., Jouzel, J., Raynaud, D., Barkov, N. I., Delaygue, G., Delmotte, M., Kotlyakov, V. M., Legrand, M., Lipenkov, V.  
179 Y., Lorius, C., and Saltzman, E.: Climate and atmospheric history of the past 420,000 years from the Vostok ice core,  
180 Antarctica, *Nature*, 399, 1999.

181 Souchez, R., Petit, J. R., Jouzel, J., Simões, J., De Angelis, M., Barkov, N., Stievenard, M., Vimeux, F., Sleewaegen, J., and  
182 Lorrain, R.: Highly deformed basal ice in the Vostok core, Antarctica, *Geophys. Res. Lett.*, 29,  
183 <https://doi.org/10.1029/2001GL014192>, 2002.

184 Steig, E. J., Morse, D. L., Waddington, E. D., Stuiver, M., Grootes, P. M., Mayewski, P. A., Twickler, M. S., and Whitlow, S.  
185 I.: Wisconsinan and Holocene climate history from an ice core at Taylor Dome, Western Ross Embayment, Antarctica,  
186 *Geografiska Annaler. Series A, Physical Geography*, 82, 213–235, 2000.

187 Steinhage, D., Kipfstuhl, S., Nixdorf, U., and Miller, H.: Internal structure of the ice sheet between Kohnen station and Dome  
188 Fuji, Antarctica, revealed by airborne radio-echo sounding, *Ann. Glaciol.*, 54, 163–167,  
189 <https://doi.org/10.3189/2013AoG64A113>, 2013.

190 Svensson, A.: Visual stratigraphy of the North Greenland Ice Core Project (NorthGRIP) ice core during the last glacial period,  
191 *J. Geophys. Res.*, 110, <https://doi.org/10.1029/2004JD005134>, 2005.

192 Tison, J.-L., de Angelis, M., Littot, G., Wolff, E., Fischer, H., Hansson, M., Bigler, M., Udisti, R., Wegner, A., Jouzel, J.,  
193 Stenni, B., Johnsen, S., Masson-Delmotte, V., Landais, A., Lipenkov, V., Loulergue, L., Barnola, J.-M., Petit, J.-R., Delmonte,  
194 B., Dreyfus, G., Dahl-Jensen, D., Durand, G., Bereiter, B., Schilt, A., Spahni, R., Pol, K., Lorrain, R., Souchez, R., and Samyn,  
195 D.: Retrieving the paleoclimatic signal from the deeper part of the EPICA Dome C ice core, *The Cryosphere*, 9, 1633–1648,  
196 <https://doi.org/10.5194/tc-9-1633-2015>, 2015.

197 Urbini, S., Cafarella, L., Zirizzotti, A., Bianchi, C., Tabacco, I., and Frezzotti, M.: Location of a new ice core site at Talos  
198 Dome (East Antarctica), *Annals of Geophysics*, 49, <https://doi.org/10.4401/ag-3104>, 2006.

199 Vasiliev, N. I., Talalay, P. G., Bobin, N. E., Chistyakov, V. K., Zubkov, V. M., Krasilev, A. V., Dmitriev, A. N., Yankilevich,  
200 S. V., and Lipenkov, V. Y.: Deep drilling at Vostok station, Antarctica: history and recent events, *Ann. Glaciol.*, 47, 10–23,  
201 <https://doi.org/10.3189/172756407786857776>, 2007.

202 Verbeke, V., Lorrain, R., Johnsen, S. J., and Tison, J.-L.: A multiple-step deformation history of basal ice from the Dye 3  
203 (Greenland) core: new insights from the CO<sub>2</sub> and CH<sub>4</sub> content, *Ann. Glaciol.*, 35, 231–236,  
204 <https://doi.org/10.3189/172756402781817248>, 2002.

205 Voigt, D. E.: C-axis Fabric of the South Pole Ice Core, SPC14 [data set], <https://doi.org/10.15784/601057>, 2017.

206 WAIS Divide Project Members: Onset of deglacial warming in West Antarctica driven by local orbital forcing, *Nature*, 500,  
207 440–444, <https://doi.org/10.1038/nature12376>, 2013.

208 Wang, Y., Thorsteinsson, T., Kipfstuhl, J., Miller, H., Dahl-Jensen, D., and Shoji, H.: A vertical girdle fabric in the NorthGRIP  
209 deep ice core, North Greenland, *Ann. Glaciol.*, 35, 515–520, <https://doi.org/10.3189/172756402781817301>, 2002.

210 Wang, Z., Chung, A., Steinhage, D., Parrenin, F., Freitag, J., and Eisen, O.: Mapping age and basal conditions of ice in the  
211 Dome Fuji region, Antarctica, by combining radar internal layer stratigraphy and flow modeling, *The Cryosphere*, 17, 4297–  
212 4314, <https://doi.org/10.5194/tc-17-4297-2023>, 2023.

213 Weikusat, I., Kipfstuhl, S., and Lambrecht, A.: Crystal c-axes (Fabric G20) of Ice Core Samples Collected from the EDML  
214 Ice Core with Links to Raw Data Files [data set], <https://doi.org/10.1594/PANGAEA.807207>, 2013.

215 Wright, D. L., Bradley, J. A., and Hodge, S. M.: Use of a new high-speed digital data acquisition system in airborne ice-  
216 sounding, IEEE Trans. Geosci. Remote Sensing, 27, 561–567, <https://doi.org/10.1109/TGRS.1989.35938>, 1989.
