# Supplementary material for: Advancing interpretation of incoherent scattering in ice penetrating radar data used for ice core site selection
Source: Copernicus journal article supplement (doi:10.5194/egusphere-2024-2450), 2024-09-02
Supplement: Supplementary file 2 [file SupplementaryTable_02_IceCoreData.xlsx]

## Sheet: Sheet1
Supplementary Table 2: Ice Core Data and Noteworthy Observations
Supporting Manuscript: Advancing interpretation of incoherent scattering in ice penetrating radar data used for ice core site selection
Authors: Ellen Mutter and Nicholas Holschuh
The table below contains ice core data, drawn from the literature, that forms the basis for core annotations in Figure 4 of the main text.
Ice Core	Length	Lat/Lon	Onset Depth of Disturbed Climate Record	Oldest Continuous Ice Age	Chemical Observations and Chronological Syncronizations	Physical Observations	C-axis Data Reference
GREENLAND
Camp Century	1387.4 m	77.167, -61.133	~1350m (Johnsen et al., 2001, Figure 2)	104 kyr (GI23.1) around 1310 m (Johnsen et al., 2001; Rasmussen et al., 2014)	Top - 1310 m: δ18O values matched to GRIP Greenland Interstadials (GI) up to GI 23 (Johnsen et al., 2001)	1370.5 - 1387.4 m: ice contains silt bands and pebbles (Hansen and Langway, 1966)	Herron and Langway, 1982
					Top - 1313 m: δ18O matched to DYE3 (Dansgaard et al., 1982)
					1310 - ~1350 m: significant variations in δ18O values could indicative abrupt climate changes during Eemian or distorted ice (Johnsen et al., 2001)
DYE-3	2037 m (27m silty ice)	65.183, -43.8167	1940m (Johnsen et al., 2001, Figure 2)	49.6 kyr (GI 14a ) around 1940 m (Johnsen et al., 2001; Rasmussen et al., 2014)	1895 m: gas records of δ15N−N2 and CH4 suggest overturned folds (Buizert et al., 2024)	Basal layers contain high silt content (Johnsen et al., 2001)	Langway et al., 1988; Herron et al., 1985
					Top - 1987 m: δ18O values matched to Camp Century (Dansgaard et al., 1982)	2012 - 2037.8 m: Visible silty ice inclusions (Verbeke et al., 2002)
					Top to 1900 m: δ18O values matched to GRIP (Johnsen et al., 2001)
					1925 and 1940 m: δ18O values used to identify GI 12 and GI 14 (Johnsen et al., 2001)
					1987 - 2015 m: homogenous δ18O values interpreted as folding/deformation (Dansgaard et al., 1982)
EGRIP	2663 m	75.633, -35.983	Preliminarily assessed to be continuous (Stoll et al., 2024)	110,940 kyr (GI 25a) around 2590 m (Stoll et al., 2024)	Top - 1384 m: dielectric profiling (DEP) and electrical conductivity measurements (ECM) synchronized to NEEM and NGRIP (Mojtabavi et al., 2020)	1375 - 2120 m: cm-scale overturning folds, boudin-like structures, and duplex structures containing layers tilted in opposite directions (Westhoff, 2021)	Stoll et al., 2024
					1384 - 2618.3 m: preliminary matching of DEP and ECM between EGRIP and NGRIP suggests record extends through Eemain-glacial transition. Last preliminary tie point at GI 25a (Stoll et al., 2024)
GISP2	3053.4 m	72.583, -38.467	~2750 m (Chappellaz et al., 1997)	98.1 kyr at 2736 m (Bender et al., 1999)	Below 2750: rapid fluctuations in δ18Oatm and large fast CH4 fluctuations nonsynchronous with Vostok 3G record (Chappellaz et al, 1997)	2200 m: wavy strata (Gow et al., 1997)	Gow et al., 1997; Alley et al., 1997
						2400 m: cm-scale overturning folds (Gow et al., 1997), mm-scale z-foldes (Alley et al., 1995)
						2545 m: z-shaped folds (Gow et al., 1997)
						2679 m: inclined layering up to 20 degrees (Alley et al., 1995)
						Below 2750 m: disturbed structures increase in incidence and complexity with depth (Gow et al., 1997)
						2810 m: m-scale deformation (Gow et al., 1997), inclined layer over 20 degrees (Alley et al., 1995), first evidence of meter-scale disturbance (Gow et al., 1997)
GRIP	3029 m	72.6, -37.6	~2750 m (Chappellaz et al., 1997)	104 kyr (GI 23.1) around 2750 m (Grootes et al., 1993; Rasmussen et al., 2014)	Below 2750: rapid fluctuations in δ18Oatm and large fast CH4 fluctuations nonsynchronous with Vostok 3G record (Chappellaz et al, 1997)	2483 m: mm-scale z-folds (Alley et al., 1995)	Thorsteinsson et al., 1997
					2780 - 2850 m: δ18Oatm matched to Vostok timescale show alternating layers from MIS 5d and MIS5e with thickness up to ~20 m (Landais et al., 2003)	Below 2750 m: inclined layering up to 20 degrees, discontinous layers, small scale folds (Alley et al., 1995)
					2850 - 2920 m: flat stable water isotope levels suggest folding below ~meter-scale sampling resolution (Landais et al., 2003)
NEEM	2540 m	77.45, -51.05	2209.6 m (NEEM Community Member, 2013)	109.4 kyr at 2206.5 m (Gkinis et al., 2020)	2209.6 m, 2262.15 m, 2364.45 m, 2432.19 m: stratigraphic disruptions identified from δ18Oice discontinuities in δ18Oice and shifts in gas measurements (NEEM Community Members, 2013)	Below ~1750 m: cm-scale wave-like features and z-folds (Jansen et al., 2015)	Eichler, 2013; Montagnat et al., 2014
						1977 and 2098 m: dm-scale disturbances (Jansen et al., 2015)
						2147 and 2175 m: inclined less distinct banding (Jansen et al., 2015)
NGRIP	3090 m	75.1, -42.3	Continuous (Capron et al., 2010)	121.9 kyr at 3073.1 m (Capron et al., 2010)	2544 - 3073.1 m: δ18O of O2 (δ18Oatm) and CH4 profiles matched to EDML and EDML1 chronology (Capron et al., 2010)	Below 2600 m: micro folds (Svensson et al., 2005)	Wang et al., 2002
					2940 m: depth shift between δ15N and CH4 vs δ18O during DO24 used to verify continuity of deepest layers (North Greenland Ice Core Project Members, 2004)	Below 2800 m: diffuse and inclined layering (Svensson et al., 2005)
						Below 3017 m: large crystals (Svensson et al., 2005)
ANTARCTICA
Byrd	2164 m	-80.017, -119.517	Between 2144 and 2159 m (Gow et al., 1979)	90.953 kyr BP (before 1950) at 2144.72 m (Ahn and Brook, 2008)	1315 - 2144m: atmospheric CO2 data synchronized to GRIP and GISP2 with CH4 correlation (Ahn and Brook, 2008)	2159-2164 m: bands of salt, sand and pebbles (Gow et al., 1968, Gow et al., 1979)	Gow and Williamson, 1976
					2154 - 2164 m: gas volume measurements show transition between air-rich meteoric ice and air-poor accreted subglacial ice at 2159 m (Gow et al., 1979)
Dome C	3260 m (EDC99)	-75.102, 123.395	Potential discontinuity around 3200 m (Jouzel et al., 2007, Tison et al., 2015)	801.662 kyr at 3189.45 m (Parrenin et al., 2007)	3160 - 3170 m: enhanced 10Be deposition matched to Matuyama-Brunhes geomagnetic reversal (Jouzel et al., 2007)	“Deep ice:” inclined layers of a few degrees (EPICA Community Members, 2004)	Durand et al., 2009
					3160 - 3185m: CO2 and CH4 profiles establish presence of MIS 18 and 19 (Loulergue et al., 2008)	Below 3000 m: angle between orientation of c-axis cluster and in situ vertical up to 35° (Durand et al., 2009)
					Above 3200 m: δDice matched to deep-sea benthic 18O record ( Jouzel et al., 2007)
					3200 - 3260m: damped variability in δDice, 18O, δ18Oair, CH4, and CO2 suggest disturbance (Jouzel et al., 2007 SOM Text)
					3200 - 3260 m: δD, total air content, gas composition, and dust content suggest continuity while δ18Oatm, visible inclusions, length of the glacial period, and variability of chemical species distribution suggest altered stratigraphy (Tison et al., 2015)
Dome Fuji	3035 m (DF2)	-77.317, 39.703	Continuous (Dome Fuji Ice Core Project Members, 2017)	715.9 kyr at 3028 m (Uemura et al., 2018)	2500 - 3028 m: δ18O and other isotope records synchronized to Antarctice Ice Cores Choronology 2012 (AICC2012) age scale (Dome Fuji Ice Core Project Members, 2017)	2600 - 2800 m: inclination of visible layers ~ 20° (Saruya et al., 2024, Figure 5)	Saruya et al., 2022, 2024
						2800 - 2950 m: inclination of visible layers at least 35° (Saruya et al., 2024, Figure 5)
						below 2950 m: inclination of visible layers up to 55° (Saruya et al., 2024, Figure 5)
						Basal layers: discontinuity or folding is not observed, instead basal melt resulted in thicker annual layers in MIS 16 (as compared to Dome C) (Dome Fuji Ice Core Project Members, 2017)
EDML	2774 m	-75.002, 0.068	Chronology restricted to 2417 m (Ruth et al., 2007)	150.1 kyr at 2416 m (Ruth et al., 2007)	0 - 2366 m: matched to EDC3 volcanic events using dielectric profiling, SO4, and electrolytic conductivity (Ruth et al., 2007)	2050 - 2150 m: mm-scale undulations and inclined layers up to 15° (Faria et al. 2010)	Eisen et al., 2007; Faria et al., 2018; Weikusat et al., 2013
					2366 - 2415 m: matched insoluble dust concentrations, δ18O, and δD to EDC3 chronology (Ruth et al,. 2007)	2150 - 2385 m: cm-size undulations and z-folds; inclined layers up to 30° (Faria et al. 2010, Faria et al., 2018)
					Below 2452: matching unclear due to peak diffusion and ambiguity (Ruth et al,. 2007)	2385 - 2405 m: flat horizontal CBs (Faria et al., 2010)
						2405 - 2600 m: decimeter scale and larger z-folds and interpenetrating strata (Faria et al. 2010)
						Below 2600 m: unidentifiable banding; grain size up to .5 m (Faria et al., 2010)
Siple Dome	1004 m	-81.658, -148.809	Potential discontinuity around 800m (Gow and Meese, 2007)	42.7 kyr at 854.5 m from methane tie point (Brook et al. 2005); chronology extended to 56.7 kyr at 919.9 m using δ18Oatm control point (Brook et al., 2005)	514 - 854 m: methane depth curve correlated to GISP and GRIP (Brook et al. 2005)	0-500 m: at least 20 melt layers were identified (Gow and Meese, 2007)	Gow and Meese, 2007
					Below 854 m: sparse methane record (Brook et al., 2005)	500-800 m: 8 melt layers identified (Gow and Meese, 2007)
					919 m: δ18Oatm control point used to extend chronology to 57 kyr with 2 kyr uncertainty (Brook et al. 2005), however δ18O profile may include flow induced artifacts (Faria et al., 2010)	Below 800 m: Core quality degraded preculding identification of melt events (Gow and Meese, 2007)
						432 m: slight tilting of annual layers (Gow and Meese, 2007)
						559 - 800 m: intervals of inclined layering and reversed dips, occasionally exceeding 10° (Gow and Meese, 2007)
						780 m: steeply inclined layering (Gow and Meese, 2003)
						Below 800 m: absence of layer structure (Gow and Meese, 2003)
						1002 - 1004 m: sediment entrained in ice (Gow and Meese, 2003)
SPICE	1751 m	-89.99, -98.16	Continuous through drilled depth (coring stopped 1000 m above bed (Casey et al. 2014))	54.3 kyr at 1751 m (Winski et al., 2019)	Above 735 m: chronology based on annual layer counting and synchronization of volcanic sulfate peaks to WAIS Divide ice core (Fegyveresi et al., 2019)	306 m: undisturbed tephra layer (Fegyveresi et al., 2019)	Voigt, 2017
					Through 1751 m: chronology based synchronization of CH4 variations to WAIS Divide ice core (Epifanio et al., 2020)	Below 735 m: diffuse layering (Fegyveresi et al., 2019)
Talos Dome (TALDICE)	1620 m (175 m above bedrock)	-72.8166,159.1833	1548 m (Crotti et al., 2021)	343.8 kyr at 1547.65 m (Crotti et al., 2021)	Above 1428 m: TALDICE-1 chronology combines glaciological modelling to CH4 and d18Oatm records synchronization with dated ice cores (Crotti et al., 2021)	Above 1280 m: tephra layers are horizontal and undisturbed (Narcisi et al., 2017, Supplementary Figure 1)	Montagnat et al., 2012
					Between 1428 and 1548 m: TALDICE-deep1 chronology based on new gas (δ18Oatm, δ15N and δO2/N2), ice (δD), and 81Kr measurements (Crotti et al., 2021)
					1548 - 1620 m: chemical signatures become quasi-flat, preventing interpretation of climate record (Crotti et al., 2021)
Taylor	554 m	-77.795,158.71833	Continuous (Steig et al., 2000)	230 kyr at 551.2 m (Steig et al., 2006)	st9810 time scale (Steig et al., 2000)	Basal ice: frozen to bed, no zone of silty ice (Steig et al., 2000)	Kennedy et al., 2013
					0 - 140 m: vertical strain measurements (Steig et al., 2000)
					140 - 356 m: finite element ice flow model (Steig et al., 2000)
					380 - 530 m: trace gas measurements (CH4 , δ18Oatm) and 10Be anomalies matched to Vostok and GISP2 chronologies (Steig et al., 2000)
					530 - 554 m: δ18O record includes ice from MIS6 (Steig et al., 2000)
Vostok	3769 m for cores 5G-2 & 5G-3 (Lipenkov et al, 2016)	-78.467, 106.8	3311 m (Souchez et al., 2002)	423 kyr at 3310 m (Petit et al., 1999)	3320 - 3330 m: lack of depth shift between rapid δDice v.s. CO2 and CH4 values indicate stratigraphic disruption (Petit et al., 1999)	3311 m: inclined ash layers up to 25° from horizontal in opposite directions (Souchez et al., 2002)	Obbard and Baker, 2007
			Below 3539 m: accreted lake ice (Souchez et al., 2002)		3405 - 3538 m: damping of δD variations and marine (Na+m, Cl-) and terrestrial (non-sea salt Mg++ and Ca++) trace impurities (Souchez et al., 2002)	Below 3449 m: interbedding of high impurity, fine grained, single maximum fabric ice and low impurity, coarse grained, girdle-fabric ice (Souchez et al., 2002)
						3310 - 3460 m: decameter scale folding (Lipenkov and Raynaud, 2015)
						3460 - 3539 m: sub-meter scale folding (Lipenkov and Raynaud, 2015)
WAIS	3405 m	-79.467, -112.085	Continuous (coring stopped 50m above bed (WAIS Divide Project Members, 2013))	67.7 kyr at 3404 m (Buizert et al., 2015)	Above 2850 m: chronology based on annual layer counting (WAIS Divide Project Members, 2013)	2700 - 2900 m: multitrack electrical conductivity measurements (ECM) with pinched and discontinuous layers (Fudge et al., 2016)	Fitzpatrick et al., 2014
					Below 2850 m: CH4 synchronization to NGRIP δ18O record and refined Hulu Cave speleothem δ18O record (Buizert et al., 2015)	2900 - 3100 m: Diffuse banding in ECM (Fudget et al., 2016)
						3150 and 3231.78 m: mm-scale disturbance in visual stratigraphy (Fitzpatrick et al., 2014)
