# Supplementary material for: Advancing interpretation of incoherent scattering in ice penetrating radar data used for ice core site selection
Source: Copernicus journal article supplement (doi:10.5194/egusphere-2024-2450), 2024-09-02
Supplement: Supplementary file 3 [file egusphere-2024-2450-supplement.zip]

1 **Supplement to: Advancing interpretation of incoherent scattering in**  
2 **ice penetrating radar data used for ice core site selection**

3  
4 Ellen Mutter<sup>1</sup> and Nicholas Holschuh<sup>2</sup>

5 <sup>1</sup>Department of Earth and Atmospheric Sciences, Cornell University, Ithaca, NY, 14853, USA

6 <sup>2</sup>Department of Geology, Amherst College, Amherst, MA 01002, USA

7 *Correspondence to:* Nicholas Holschuh ([nholschuh@amherst.edu](mailto:nholschuh@amherst.edu))

8 Below, we provide three supplementary figures that provide the broader context that justifies interpretations of the radar data  
9 in the main text. Here, we also include the reference list for Supplementary Tables 1 and 2.

10

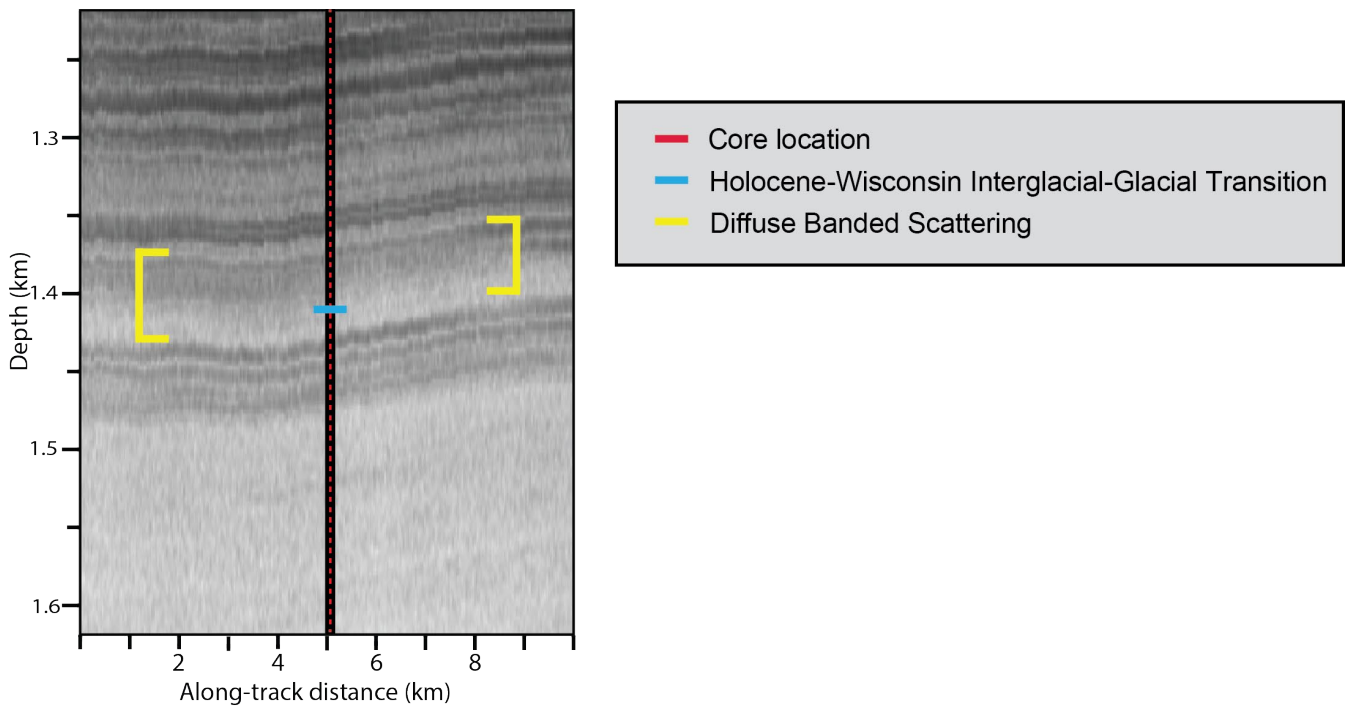

11

12 **Figure S1: NEEM radargram from depths spanning the Holocene-Wisconsin Interglacial-Glacial transition at 1419 m.**  
13 **The climactic transition is coincident with a transition from a weak vertical girdle c-axis fabric to a strong single**  
14 **maximum c-axis fabric and is collocated with a band of diffuse scattering in the radargram.**

15

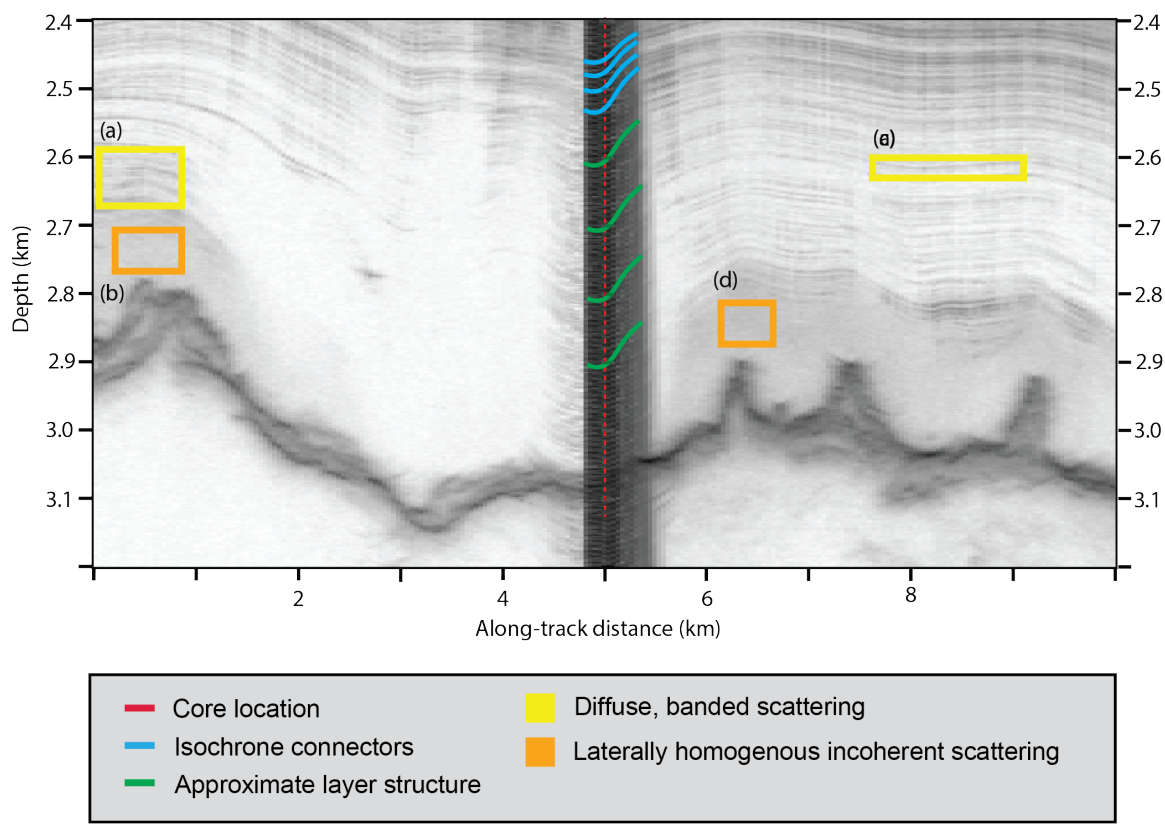

18 **Figure S2: Dome Fuji radargram with layer tracing across borehole (strong scattering at the ice drill core site is caused**  
19 **by borehole fluid in the ice core cavity). Examples of diffuse banded scattering (a,c) and laterally homogeneous**  
20 **incoherent scattering (b,d). The diffuse banded layer at (c) dips to ~2700 m at the core site and the onset of the**  
21 **homogenous incoherent scattering unit at (d) dips to ~2900 m at the core site.**

22

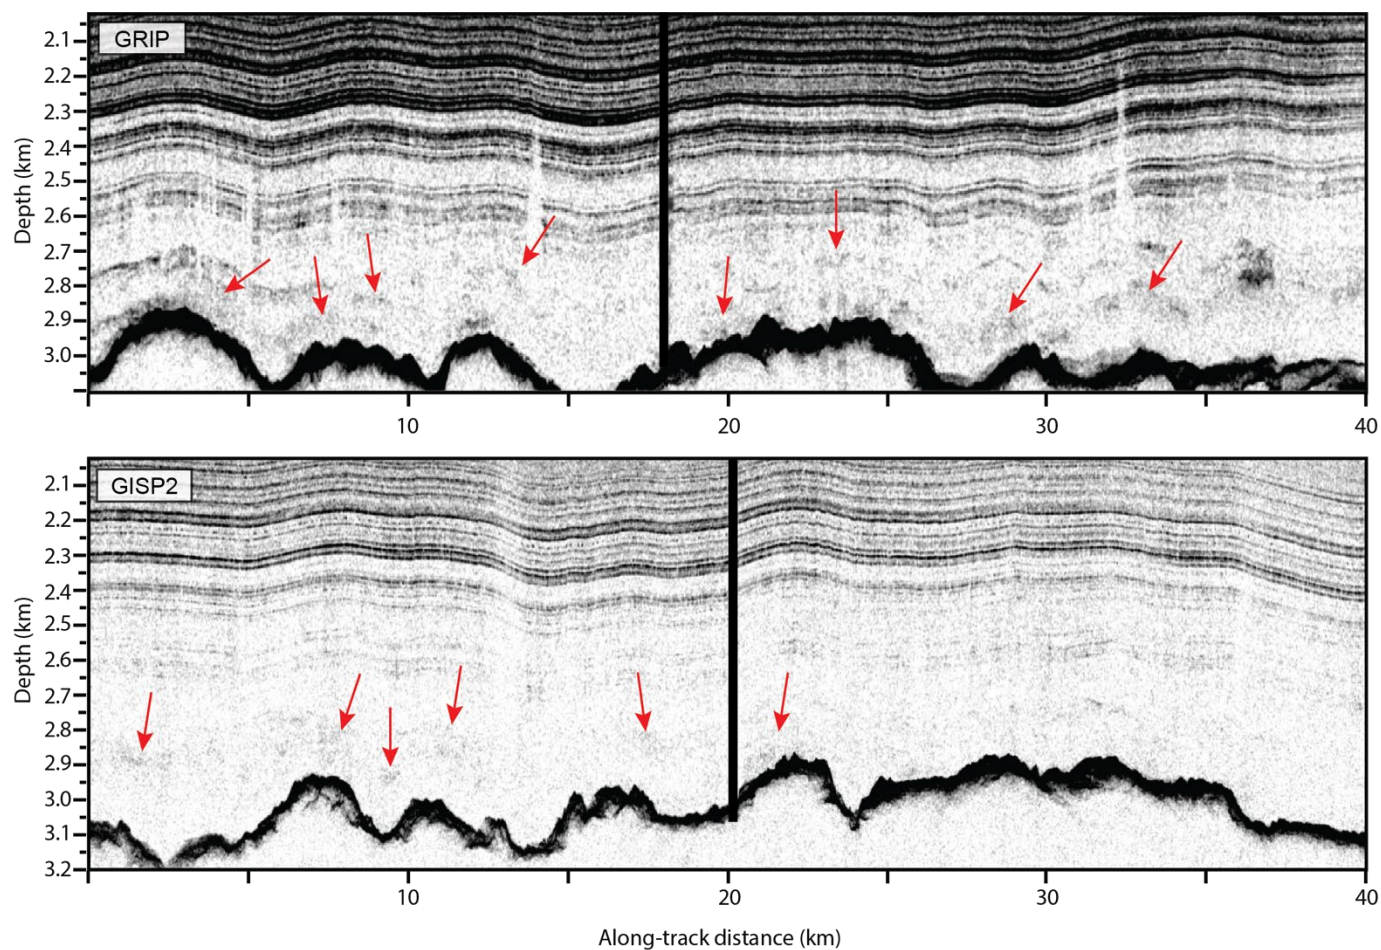

23

24 **Figure S3: 40 km length radar transects from GRIP and GISP2. Examples of strong laterally heterogeneous incoherent**  
 25 **scattering indicated with red arrows. Black vertical line depicts location of ice core.**

26

## 27    **References in Supplementary Material**

- 28    Ahn, J. and Brook, E. J.: Atmospheric CO<sub>2</sub> and climate on millennial time scales during the Last Glacial Period, *Science*, 322,  
29    83–85, <https://doi.org/10.1126/science.1160832>, 2008.
- 30    Alley, R. B., Gow, A. J., Johnsen, S. J., Kipfstuhl, J., Meese, D. A., and Thorsteinsson, T.: Comparison of deep ice cores,  
31    *Nature*, 373, 393–394, <https://doi.org/10.1038/373393b0>, 1995a.
- 32    Alley, R. B., Gow, A. J., and Meese, D. A.: Mapping c-axis fabrics to study physical processes in ice, *J. Glaciol.*, 41, 197–203,  
33    <https://doi.org/10.3189/S0022143000017895>, 1995b.
- 34    Alley, R. B., Gow, A. J., Meese, D. A., Fitzpatrick, J. J., Waddington, E. D., and Bolzan, J. F.: Grain-scale processes, folding,  
35    and stratigraphic disturbance in the GISP2 ice core, *J. Geophys. Res. Oceans*, 102, 26819–26830,  
36    <https://doi.org/10.1029/96JC03836>, 1997.
- 37    Brook, E. J., White, J. W. C., Schilla, A. S. M., Bender, M. L., Barnett, B., Severinghaus, J. P., Taylor, K. C., Alley, R. B.,  
38    and Steig, E. J.: Timing of millennial-scale climate change at Siple Dome, West Antarctica, during the last glacial period,  
39    *Quat. Sci. Rev.*, 24, 1333–1343, <https://doi.org/10.1016/j.quascirev.2005.02.002>, 2005.
- 40    Buizert, C., Cuffey, K. M., Severinghaus, J. P., Baggenstos, D., Fudge, T. J., Steig, E. J., Markle, B. R., Winstrup, M., Rhodes,  
41    R. H., Brook, E. J., Sowers, T. A., Clow, G. D., Cheng, H., Edwards, R. L., Sigl, M., McConnell, J. R., and Taylor, K. C.: The  
42    WAIS Divide deep ice core WD2014 chronology – Part 1: Methane synchronization (68–31 ka BP) and the gas age–ice age  
43    difference, *Clim. Past*, 11, 153–173, <https://doi.org/10.5194/cp-11-153-2015>, 2015.
- 44    Capron, E., Landais, A., Lemieux-Dudon, B., Schilt, A., Masson-Delmotte, V., Buiron, D., Chappellaz, J., Dahl-Jensen, D.,  
45    Johnsen, S., Leuenberger, M., Loulergue, L., and Oerter, H.: Synchronising EDML and NorthGRIP ice cores using  $\delta^{18}\text{O}$  of  
46    atmospheric oxygen ( $\delta^{18}\text{O}_{\text{atm}}$ ) and CH<sub>4</sub> measurements over MIS5 (80–123 kyr), *Quat. Sci. Rev.*, 29, 222–234,  
47    <https://doi.org/10.1016/j.quascirev.2009.07.014>, 2010.
- 48    Casey, K. A., Fudge, T. J., Neumann, T. A., Steig, E. J., Cavitte, M. G. P., and Blankenship, D. D.: The 1500 m South Pole  
49    ice core: recovering a 40 ka environmental record, *Ann. Glaciol.*, 55, 137–146, <https://doi.org/10.3189/2014AoG68A016>,  
50    2014.
- 51    CReSIS: Radar Depth Sounder Data [data set], 2024.
- 52    Dahl-Jensen, D., Gundestrup, N. S., Miller, H., Watanabe, O., Johnsen, S. J., Steffensen, J. P., Clausen, H. B., Svensson, A.,  
53    and Larsen, L. B.: The NorthGRIP deep drilling programme, *Ann. Glaciol.*, 35, 1–4,  
54    <https://doi.org/10.3189/172756402781817275>, 2002.
- 55    Dansgaard, W.: A New Greenland Deep Ice Core, 6, 1982.
- 56    Dome Fuji Ice Core Project Members: State dependence of climatic instability over the past 720,000 years from Antarctic ice  
57    cores and climate modeling, *Sci. Adv.*, 3, <https://doi.org/10.1126/sciadv.1600446>, 2017.
- 58    Durand, G., Svensson, A., Persson, A., Gillot-Chaulc, F., Montagnat, M., and Dahl-Jensen, D.: Evolution of the texture along  
59    the EPICA Dome C ice core, *Low Temperature Science Supplement Issue: Physics of Ice Core Records II*, 68, 91–105, 2009.
- 60    Eichler, J.: C-axis analysis of the NEEM ice core, Thesis, Freie Universitat, Berlin, Germany, 63 pp., 2013.

61 Eisen, O., Hamann, I., Kipfstuhl, S., Steinhage, D., and Wilhelms, F.: Direct evidence for continuous radar reflector originating  
62 from changes in crystal-orientation fabric, *The Cryosphere*, 1, 1–10, <https://doi.org/10.5194/tc-1-1-2007>, 2007.

63 Engelhardt, H.: Ice temperature and high geothermal flux at Siple Dome, West Antarctica, from borehole measurements, *J.*  
64 *Glaciol.*, 50, 251–256, <https://doi.org/10.3189/172756504781830105>, 2004.

65 EPICA community members: Eight glacial cycles from an Antarctic ice core, *Nature*, 429, 623–628,  
66 <https://doi.org/10.1038/nature02599>, 2004.

67 Epifanio, J. A., Brook, E. J., Buizert, C., Edwards, J. S., Sowers, T. A., Kahle, E. C., Severinghaus, J. P., Steig, E. J., Winski,  
68 D. A., Osterberg, E. C., Fudge, T. J., Aydin, M., Hood, E., Kalk, M., Kreutz, K. J., Ferris, D. G., and Kennedy, J. A.: The SP19  
69 chronology for the South Pole Ice Core – Part 2: gas chronology,  $\Delta$ age, and smoothing of atmospheric records, *Clim. Past*, 16,  
70 2431–2444, <https://doi.org/10.5194/cp-16-2431-2020>, 2020.

71 Faria, S. H., Freitag, J., and Kipfstuhl, S.: Polar ice structure and the integrity of ice-core paleoclimate records, *Quat. Sci. Rev.*,  
72 29, 338–351, <https://doi.org/10.1016/j.quascirev.2009.10.016>, 2010.

73 Faria, S. H., Kipfstuhl, S., and Lambrecht, A.: The EPICA-DML Deep Ice Core: A Visual Record, Springer Berlin Heidelberg,  
74 Berlin, Heidelberg, 305 pp., <https://doi.org/10.1007/978-3-662-55308-4>, 2018.

75 Fegyveresi, J. M., Fudge, T. J., Ferris, D. G., Winski, D. A., and Alley, R. B.: Visual observations and stratigraphy of the  
76 South Pole Ice Core (SPICEcore) : a preliminary Holocene (~10.2 ka) accumulation record and depth-age chronology, Cold  
77 Regions Research and Engineering Laboratory, 2019.

78 Ferraccioli, F., Forsberg, R., Matsuoka, K., Olesen, A. V., Jordan, T., Corr, H., Robinson, C., and Kohler, J.: Processed  
79 Airborne Radio-Echo Sounding Data from the POLARGAP Survey Covering the South Pole, and Foundation and Recovery  
80 Glaciers, East Antarctica [data set], <https://doi.org/10.5285/e8a29fa7-a245-4a04-8b56-098defa134b9>, 2021a.

81 Ferraccioli, F., Corr, H., Jordan, T., Robinson, C., Armadillo, E., Bozzo, E., and Caneva, G.: Processed Airborne Radio-Echo  
82 Sounding Data from the WISE-ISODYN Survey Across the Wilkes Subglacial Basin, East Antarctica (2005/2006) [data set],  
83 <https://doi.org/10.5285/70adab3d-3632-400d-9aa1-ddf2d62a11b3>, 2021b.

84 Fitzpatrick, J. J., Voigt, D. E., Fegyveresi, J. M., Stevens, N. T., Spencer, M. K., Cole-Dai, J., Alley, R. B., Jardine, G. E.,  
85 Cravens, E. D., Wilen, L. A., Fudge, T. J., and McConnell, J. R.: Physical properties of the WAIS Divide ice core, *J. Glaciol.*,  
86 60, 1181–1198, <https://doi.org/10.3189/2014JoG14J100>, 2014.

87 Fudge, T. J., Taylor, K. C., Waddington, E. D., Fitzpatrick, J. J., and Conway, H.: Electrical stratigraphy of the WAIS Divide  
88 ice core: identification of centimeter-scale irregular layering, *J. Geophys. Res. Earth Surf.*, 121, 1218–1229,  
89 <https://doi.org/10.1002/2016JF003845>, 2016.

90 Gow, A. J. and Meese, D.: Physical properties, crystalline textures and c-axis fabrics of the Siple Dome (Antarctica) ice core,  
91 *J. Glaciol.*, 53, 573–584, <https://doi.org/10.3189/002214307784409252>, 2007.

92 Gow, A. J. and Meese, D. A.: The Physical and Structural Properties of the Siple Dome Ice Cores [data set],  
93 <https://doi.org/10.7265/N5668B34>, 2003.

94 Gow, A. J. and Williamson, T.: Rheological implications of the internal structure and crystal fabrics of the West Antarctic ice  
95 sheet as revealed by deep core drilling at Byrd Station, *Geol Soc America Bull.*, 87, 1665, [https://doi.org/10.1130/0016-7606\(1976\)87<1665:RIOTIS>2.0.CO;2](https://doi.org/10.1130/0016-7606(1976)87<1665:RIOTIS>2.0.CO;2), 1976.

97 Gow, A. J., Ueda, H. T., and Garfield, D. E.: Antarctic ice sheet: preliminary results of first core hole to bedrock, *Science*,  
98 161, 1011–1013, <https://doi.org/10.1126/science.161.3845.1011>, 1968.

99 Gow, A. J., Epstein, S., and Sheehy, W.: On the origin of stratified debris in ice cores from the bottom of the Antarctic Ice  
100 Sheet, *J. Glaciol.*, 23, 185–192, <https://doi.org/10.3189/S0022143000029828>, 1979.

101 Gow, A. J., Meese, D. A., Alley, R. B., Fitzpatrick, J. J., Anandakrishnan, S., Woods, G. A., and Elder, B. C.: Physical and  
102 structural properties of the Greenland Ice Sheet Project 2 ice core: A review, *J. Geophys. Res.*, 102, 26559–26575,  
103 <https://doi.org/10.1029/97JC00165>, 1997.

104 Grootes, P. M., Steig, E., and Minze, S.: Taylor Ice Dome study 1993-1994: an ice core to bedrock, *Antarct. J.*, 79–81, 1994.

105 Hansen, B. L. and Langway, C. C.: Deep core drilling in ice and core analysis at Camp Century, Greenland, 1961-1966,  
106 *Antarct. J.*, 126, 207–208, 1966.

107 Herron, S. L. and Langway, C. C.: A Comparison of Ice Fabrics and Textures at Camp Century, Greenland and Byrd Station,  
108 Antarctica, *Annals of Glaciology*, 3, 118–124, <https://doi.org/10.3189/S0260305500002639>, 1982.

109 Herron, S. L., Langway Jr., C. C., and Brugger, K. A.: Ultrasonic Velocities and Crystalline Anisotropy in the Ice Core from  
110 Dye 3, Greenland, in: *Greenland Ice Core: Geophysics, Geochemistry, and the Environment*, American Geophysical Union  
111 (AGU), 23–31, <https://doi.org/10.1029/GM033p0023>, 1985.

112 Hodge, S. M., Wright, D. L., Bradley, J. A., Jacobel, R. W., Skou, N., and Vaughn, B.: Determination of the surface and bed  
113 topography in central Greenland, *J. Glaciol.*, 36, 17–30, <https://doi.org/10.3189/S0022143000005505>, 1990.

114 Jansen, D., Llorens, M.-G., Westhoff, J., Steinbach, F., Kipfstuhl, S., Bons, P., Grier, A., and Weikusat, I.: Small-scale  
115 disturbances in the stratigraphy of the NEEM ice core: observations and numerical model simulations, *The Cryosphere*  
116 *Discussions*, 9, <https://doi.org/10.5194/tcd-9-5817-2015>, 2015.

117 Johnsen, S. J., Clausen, H. B., Dansgaard, W., Fuhrer, K., Gundestrup, N., Hammer, C. U., Iversen, P., Jouzel, J., Stauffer, B.,  
118 and Steffensen, J. P.: Irregular glacial interstadials recorded in a new Greenland ice core, *Nature*, 359, 311–313,  
119 <https://doi.org/10.1038/359311a0>, 1992.

120 Johnsen, S. J., Dahl-Jensen, D., Gundestrup, N., Steffensen, J. P., Clausen, H. B., Miller, H., Masson-Delmotte, V.,  
121 Sveinbjörnsdóttir, A. E., and White, J.: Oxygen isotope and palaeotemperature records from six Greenland ice-core stations:  
122 Camp Century, Dye-3, GRIP, GISP2, Renland and NorthGRIP, *J. Quat. Sci.*, 16, 299–307, <https://doi.org/10.1002/jqs.622>,  
123 2001.

124 Jouzel, J., Masson-Delmotte, V., Cattani, O., Dreyfus, G., Falourd, S., Hoffmann, G., Minster, B., Nouet, J., Barnola, J. M.,  
125 Chappellaz, J., Fischer, H., Gallet, J. C., Johnsen, S., Leuenberger, M., Loulergue, L., Luethi, D., Oerter, H., Parrenin, F.,  
126 Raisbeck, G., Raynaud, D., Schilt, A., Schwander, J., Selmo, E., Souchez, R., Spahni, R., Stauffer, B., Steffensen, J. P., Stenni,  
127 B., Stocker, T. F., Tison, J. L., Werner, M., and Wolff, E. W.: Orbital and millennial Antarctic climate variability over the past  
128 800,000 years, *Science*, 317, 793–796, <https://doi.org/10.1126/science.1141038>, 2007.

129 Kennedy, J. H., Pettit, E. C., and Prinzio, C. L. D.: The evolution of crystal fabric in ice sheets and its link to climate history,  
130 *Journal of Glaciology*, 59, 357–373, <https://doi.org/10.3189/2013JoG12J159>, 2013.

131 Langway, C. C., Oeschger, H., and Dansgaard, W.: *Greenland Ice Core: Geophysics, Geochemistry, and the Environment*,  
132 American Geophysical Union, 127 pp., 1985.

133 Langway, C. C., Shoji, H., and Azuma, N.: Crystal size and orientation patterns in the Wisconsin-age ice from Dye 3,  
134 Greenland, *Ann. Glaciol.*, 10, 109–115, <https://doi.org/10.3189/S0260305500004262>, 1988.

135 Loulergue, L., Schilt, A., Spahni, R., Masson-Delmotte, V., Blunier, T., Lemieux, B., Barnola, J.-M., Raynaud, D., Stocker,  
136 T. F., and Chappellaz, J.: Orbital and millennial-scale features of atmospheric CH<sub>4</sub> over the past 800,000 years, *Nature*, 453,  
137 383–386, <https://doi.org/10.1038/nature06950>, 2008.

138 Montagnat, M., Buiron, D., Arnaud, L., Broquet, A., Schlitz, P., Jacob, R., and Kipfstuhl, S.: Measurements and numerical  
139 simulation of fabric evolution along the Talos Dome ice core, Antarctica, *Earth and Planetary Science Letters*, 357–358, 168–  
140 178, <https://doi.org/10.1016/j.epsl.2012.09.025>, 2012.

141 Montagnat, M., Azuma, N., Dahl-Jensen, D., Eichler, J., Fujita, S., Gillet-Chaulet, F., Kipfstuhl, S., Samyn, D., Svensson, A.,  
142 and Weikusat, I.: Fabric along the NEEM ice core, Greenland, and its comparison with GRIP and NGRIP ice cores, *The*  
143 *Cryosphere*, 8, 1129–1138, <https://doi.org/10.5194/tc-8-1129-2014>, 2014.

144 Morrison, M.: First GISP2 field season just completed, *Eos, Transactions American Geophysical Union*, 70, 1449–1449,  
145 <https://doi.org/10.1029/89EO00336>, 1989.

146 Morse, D. L.: Glacier Geophysics at Taylor Dome, Antarctica, Ph.D. thesis, University of Washington, Seattle, WA, USA,  
147 158 pp., 1997.

148 Narcisi, B., Petit, J. R., and Langone, A.: Last glacial tephra layers in the Talos Dome ice core (peripheral East Antarctic  
149 Plateau), with implications for chronostratigraphic correlations and regional volcanic history, *Quat. Sci. Rev.*, 165, 111–126,  
150 <https://doi.org/10.1016/j.quascirev.2017.04.025>, 2017.

151 NEEM Community Members: Eemian interglacial reconstructed from a Greenland folded ice core, *Nature*, 493, 489–494,  
152 <https://doi.org/10.1038/nature11789>, 2013.

153 Nixdorf, U., Steinhage, D., Meyer, U., Hempel, L., Jenett, M., Wachs, P., and Miller, H.: The newly developed airborne radio-  
154 echo sounding system of the AWI as a glaciological tool, *Ann. Glaciol.*, 29, 231–238,  
155 <https://doi.org/10.3189/172756499781821346>, 1999.

156 North Greenland Ice Core Project Members: High-resolution record of Northern Hemisphere climate extending into the last  
157 interglacial period, *Nature*, 431, 147–151, <https://doi.org/10.1038/nature02805>, 2004.

158 Petit, J. R., Jouzel, J., Raynaud, D., Barkov, N. I., Delaygue, G., Delmotte, M., Kotlyakov, V. M., Legrand, M., Lipenkov, V.  
159 Y., Lorius, C., and Saltzman, E.: Climate and atmospheric history of the past 420,000 years from the Vostok ice core,  
160 Antarctica, *Nature*, 399, 1999.

161 Souchez, R., Petit, J. R., Jouzel, J., Simões, J., De Angelis, M., Barkov, N., Stievenard, M., Vimeux, F., Sleewaegen, J., and  
162 Lorrain, R.: Highly deformed basal ice in the Vostok core, Antarctica, *Geophys. Res. Lett.*, 29,  
163 <https://doi.org/10.1029/2001GL014192>, 2002.

164 Steig, E. J., Morse, D. L., Waddington, E. D., Stuiver, M., Grootes, P. M., Mayewski, P. A., Twickler, M. S., and Whitlow, S.  
165 I.: Wisconsinan and Holocene climate history from an ice core at Taylor Dome, Western Ross Embayment, Antarctica,  
166 *Geografiska Annaler. Series A, Physical Geography*, 82, 213–235, 2000.

167 Steinhage, D., Kipfstuhl, S., Nixdorf, U., and Miller, H.: Internal structure of the ice sheet between Kohnen station and Dome  
168 Fuji, Antarctica, revealed by airborne radio-echo sounding, *Ann. Glaciol.*, 54, 163–167,  
169 <https://doi.org/10.3189/2013AoG64A113>, 2013.

170 Svensson, A.: Visual stratigraphy of the North Greenland Ice Core Project (NorthGRIP) ice core during the last glacial period,  
171 J. Geophys. Res., 110, <https://doi.org/10.1029/2004JD005134>, 2005.

172 Tison, J.-L., de Angelis, M., Littot, G., Wolff, E., Fischer, H., Hansson, M., Bigler, M., Udisti, R., Wegner, A., Jouzel, J.,  
173 Stenni, B., Johnsen, S., Masson-Delmotte, V., Landais, A., Lipenkov, V., Loulergue, L., Barnola, J.-M., Petit, J.-R., Delmonte,  
174 B., Dreyfus, G., Dahl-Jensen, D., Durand, G., Bereiter, B., Schilt, A., Spahni, R., Pol, K., Lorrain, R., Souchez, R., and Samyn,  
175 D.: Retrieving the paleoclimatic signal from the deeper part of the EPICA Dome C ice core, The Cryosphere, 9, 1633–1648,  
176 <https://doi.org/10.5194/tc-9-1633-2015>, 2015.

177 Urbini, S., Cafarella, L., Zirizzotti, A., Bianchi, C., Tabacco, I., and Frezzotti, M.: Location of a new ice core site at Talos  
178 Dome (East Antarctica), Annals of Geophysics, 49, <https://doi.org/10.4401/ag-3104>, 2006.

179 Vasiliev, N. I., Talalay, P. G., Bobin, N. E., Chistyakov, V. K., Zubkov, V. M., Krasilev, A. V., Dmitriev, A. N., Yankilevich,  
180 S. V., and Lipenkov, V. Y.: Deep drilling at Vostok station, Antarctica: history and recent events, Ann. Glaciol., 47, 10–23,  
181 <https://doi.org/10.3189/172756407786857776>, 2007.

182 Verbeke, V., Lorrain, R., Johnsen, S. J., and Tison, J.-L.: A multiple-step deformation history of basal ice from the Dye 3  
183 (Greenland) core: new insights from the CO<sub>2</sub> and CH<sub>4</sub> content, Ann. Glaciol., 35, 231–236,  
184 <https://doi.org/10.3189/172756402781817248>, 2002.

185 Voigt, D. E.: C-axis Fabric of the South Pole Ice Core, SPC14 [data set], <https://doi.org/10.15784/601057>, 2017.

186 WAIS Divide Project Members: Onset of deglacial warming in West Antarctica driven by local orbital forcing, Nature, 500,  
187 440–444, <https://doi.org/10.1038/nature12376>, 2013.

188 Wang, Y., Thorsteinsson, T., Kipfstuhl, J., Miller, H., Dahl-Jensen, D., and Shoji, H.: A vertical girdle fabric in the NorthGRIP  
189 deep ice core, North Greenland, Ann. Glaciol., 35, 515–520, <https://doi.org/10.3189/172756402781817301>, 2002.

190 Wang, Z., Chung, A., Steinhage, D., Parrenin, F., Freitag, J., and Eisen, O.: Mapping age and basal conditions of ice in the  
191 Dome Fuji region, Antarctica, by combining radar internal layer stratigraphy and flow modeling, The Cryosphere, 17, 4297–  
192 4314, <https://doi.org/10.5194/tc-17-4297-2023>, 2023.

193 Weikusat, I., Kipfstuhl, S., and Lambrecht, A.: Crystal c-axes (Fabric G20) of Ice Core Samples Collected from the EDML  
194 Ice Core with Links to Raw Data Files [data set], <https://doi.org/10.1594/PANGAEA.807207>, 2013.

195 Wright, D. L., Bradley, J. A., and Hodge, S. M.: Use of a new high-speed digital data acquisition system in airborne ice-  
196 sounding, IEEE Trans. Geosci. Remote Sensing, 27, 561–567, <https://doi.org/10.1109/TGRS.1989.35938>, 1989.

197
