# Supplementary material for: Advancing interpretation of incoherent scattering in ice penetrating radar data used for ice core site selection
Source: Copernicus journal article supplement (doi:10.5194/egusphere-2024-2450), 2024-09-02
Supplement: Supplementary file 7 [file egusphere-2024-2450-supplement.zip]

## Sheet: Sheet1
Supplementary Table 2: Ice Core Data and Noteworthy Observations
Supporting Manuscript: Advancing interpretation of incoherent scattering in ice penetrating radar data used for ice core site selection
Authors: Ellen Mutter and Nicholas Holschuh
The table below contains ice core data, drawn from the literature, that forms the basis for core annotations in Figure 3 of the main text.
Ice Core	Length	Onset Depth of Disturbed Climate Record	Chemical Observations and Chronological Syncronizations	Physical Observations	C-axis Data Reference
Camp Century	1387.4 m	~1350m (Johnsen et al., 2001)	Top - 1310m: δ18O values matched to GRIP Greenland Interstadials (GI) up to GI 23 (Johnsen et al., 2001)	1370.5 - 1387.4 m: ice contains silt bands and pebbles (Hansen and Langway, 1966)	Herron and Langway, 1982
			Top - 1313m: δ18O matched to DYE3 (Dansgaard et al., 1982)
			1310 - ~1350m: significant variations in δ18O values could indicative abrupt climate changes during Eemian or distorted ice (Johnsen et al., 2001)
DYE-3	2037 m (27m silty ice)	1940m (Johnsen et al., 2001, Figure 2)	Top - 1987m: δ18O values matched to Camp Century (Dansgaard et al., 1982)	Basal layers contain high silt content (Johnsen et al., 2001)	Langway et al., 1988; Herron et al., 1985
			Top to 1900m: δ18O values matched to GRIP (Johnsen et al., 2001)	2012 - 2037.8: Visible silty ice inclusions (Verbeke et al., 2002)
			1925 and 1940 m: δ18O values used to identify GI 12 and GI 14 (Johnsen et al., 2001)
			1987 - 2015 m: homogenous δ18O values interpreted as folding/deformation (Dansgaard et al., 1982)
GRIP	3029 m	~2750 m (Chappellaz et al., 1997)	Below 2750: rapid fluctuations in δ18Oatm and large fast CH4 fluctuations nonsynchronous with Vostok 3G record (Chappellaz et al, 1997)	2483 m: mm-scale z-folds (Alley et al., 1995)*	Thorsteinsson et al., 1997
			2780 - 2850 m: δ18Oatm matched to Vostok timescale show alternating layers from MIS 5d and MIS5e with thickness up to ~20 m (Landais et al., 2003)	Below 2750 m: inclined layering up to 20 degrees, discontinous layers, small scale folds (Alley et al., 1995)*
			2850 - 2920 m: flat stable water isotope levels suggest folding below ~meter-scale sampling resolution (Landais et al., 2003)
GISP2	3053.4 m	~2750 m (Chappellaz et al., 1997)	Below 2750: rapid fluctuations in δ18Oatm and large fast CH4 fluctuations nonsynchronous with Vostok 3G record (Chappellaz et al, 1997)	2200 m: wavy strata (Gow et al., 1997)	Gow et al., 1997; Alley et al., 1997
				2400 m: cm-scale overturning folds (Gow et al., 1997), mm-scale z-foldes (Alley et al., 1995)*
				2545 m: z-shaped folds (Gow et al., 1997)
				2679 m: inclined layering up to 20 degrees (Alley et al., 1995)*
				Below 2750 m: disturbed structures increase in incidence and complexity with depth (Gow et al., 1997)
				2810 m: m-scale deformation (Gow et al., 1997), inclined layer over 20 degrees (Alley et al., 1995)*, first evidence of meter-scale disturbance (Gow et al., 1997)
NGRIP	3090 m	Continuous (Capron et al., 2010)	2544 - 3073.1 m: δ18O of O2 (δ18Oatm) and CH4 profiles matched to EDML and EDML1 chronology (Capron et al., 2010)	Below 2600 m: micro folds (Svensson et al., 2005)	Wang et al., 2002
			2940 m: depth shift between δ15N and CH4 vs δ18O during DO24 used to verify continuity of deepest layers (North Greenland Ice Core Project Members, 2004)	Below 2800 m: diffuse and inclined layering (Svensson et al., 2005)
				Below 3017 m: large crystals (Svensson et al., 2005)
NEEM	2540 m	2209.6 m (NEEM Community Member, 2013)	2209.6 m, 2262.15 m, 2364.45 m, 2432.19 m: stratigraphic disruptions identified from δ18Oice discontinuities in δ18Oice and shifts in gas measurements (NEEM Community Members, 2013)	Below ~1750 m: cm-scale wave-like features and z-folds (Jansen et al., 2015)	Eichler, 2013; Montagnat et al., 2014
				1977 and 2098 m: dm-scale disturbances (Jansen et al., 2015)
				2147 and 2175 m: inclined less distinct banding (Jansen et al., 2015)
Byrd	2164 m	Between 2144 and 2159 m (Gow et al., 1979)	1315-2144m: atmospheric CO2 data synchronized to GRIP and GISP2 with CH4 correlation (Ahn and Brook, 2008)	2159-2164 m: bands of salt, sand and pebbles (Gow et al., 1968, Gow et al., 1979)	Gow and Williamson, 1976
			2154 - 2164 m: gas volume measurements show transition between air-rich meteoric ice and air-poor accreted subglacial ice at 2159 m (Gow et al., 1979)
Vostok	3658 m (5G core)	3311 m (Souchez et al., 2002)	3320-3330 m: lack of depth shift between rapid δDice v.s. CO2 and CH4 values indicate stratigraphic disruption (Petit et al., 1999)	3311m: inclined ash layers up to 25° from horizontal in opposite directions (Souchez et al., 2002)	Obbard and Baker, 2007
		Below 3539 m: accreted lake ice (Souchez et al., 2002)	3405-3538 m: damping of δD variations and marine (Na+m, Cl-) and terrestrial (non-sea salt Mg++ and Ca++) trace impurities (Souchez et al., 2002)	Below 3449 m: interbedding of high impurity, fine grained, single maximum fabric ice and low impurity, coarse grained, girdle-fabric ice (Souchez et al., 2002)
				3310 - 3460 m: decameter scale folding (Lipenkov and Raynaud, 2015)
				3460 - 3539 m: sub-meter scale folding (Lipenkov and Raynaud, 2015)
Dome C	3260 m (EDC99)	Potential discontinuity around 3200 m (Jouzel et al., 2007, Tison et al., 2015)	3160-3170 m: enhanced 10Be deposition matched to Matuyama-Brunhes geomagnetic reversal (Jouzel et al., 2007)	“Deep ice:” inclined layers of a few degrees (EPICA Community Members, 2004)	Durand et al., 2009
			3160 - 3185m: CO2 and CH4 profiles establish presence of MIS 18 and 19 (Loulergue et al., 2008)	Below 3000 m: angle between orientation of c-axis cluster and in situ vertical up to 35° (Durand et al., 2009)
			Above 3200 m: δDice matched to deep-sea benthic 18O record ( Jouzel et al., 2007)
			3200-3260m: damped variability in δDice, 18O, δ18Oair, CH4, and CO2 suggest disturbance (Jouzel et al., 2007 SOM Text)
			3200-3260 m: δD, total air content, gas composition, and dust content suggest continuity while δ18Oatm, visible inclusions, length of the glacial period, and variability of chemical species distribution suggest altered stratigraphy (Tison et al., 2015)
EDML	2774 m	Chronology restricted to 2417 m (Ruth et al., 2007)	0-2366 m: matched to EDC3 volcanic events using dielectric profiling, SO4, and electrolytic conductivity (Ruth et al., 2007)	2050 - 2150 m: mm-scale undulations and inclined layers up to 15° (Faria et al. 2010)	Eisen et al., 2007; Faria et al., 2018; Weikusat et al., 2013
			2366 - 2415 m: matched insoluble dust concentrations, δ18O, and δD to EDC3 chronology (Ruth et al,. 2007)	2150 - 2385 m: cm-size undulations and z-folds; inclined layers up to 30° (Faria et al. 2010, Faria et al., 2018)
			Below 2452: matching unclear due to peak diffusion and ambiguity (Ruth et al,. 2007)	2385 - 2405 m: flat horizontal CBs (Faria et al., 2010)
				2405 - 2600 m: decimeter scale and larger z-folds and interpenetrating strata (Faria et al. 2010)
				Below 2600 m: unidentifiable banding; grain size up to .5 m (Faria et al., 2010)
Dome Fuji	3035 m (DF2)	Continuous (Dome Fuji Ice Core Project Members, 2017)	2500 - 3028 m: δ18O and other isotope records synchronized to Antarctice Ice Cores Choronology 2012 (AICC2012) age scale (Dome Fuji Ice Core Project Members, 2017)	2600 - 2800 m: inclination of visible layers ~ 20° (Saruya et al., 2024, Figure 5)	Saruya et al., 2022, 2024
				2800 - 2950 m: inclination of visible layers at least 35° (Saruya et al., 2024, Figure 5)
				below 2950 m: inclination of visible layers up to 55° (Saruya et al., 2024, Figure 5)
				Basal layers: discontinuity or folding is not observed, instead basal melt resulted in thicker annual layers in MIS 16 (as compared to Dome C) (Dome Fuji Ice Core Project Members, 2017)
Taylor	554 m	Continuous (Steig et al., 2000)	st9810 time scale (Steig et al., 2000)	Basal ice: frozen to bed, no zone of silty ice (Steig et al., 2000)	Kennedy et al., 2013
			0 - 140 m: vertical strain measurements (Steig et al., 2000)
			140 - 356 m: finite element ice flow model (Steig et al., 2000)
			380 - 530 m: trace gas measurements (CH4 , δ18Oatm) and 10Be anomalies matched to Vostok and GISP2 chronologies (Steig et al., 2000)
			530 - 554 m: δ18O record includes ice from MIS6 (Steig et al., 2000)
Siple Dome	1004 m	Potential discontinuity around 800m (Gow and Meese, 2007)	514 - 854 m: methane depth curve correlated to GISP and GRIP(to 42.7 ka) (Brook et al. 2005)	0-500m: at least 20 melt layers were identified (Gow and Meese, 2007)	Gow and Meese, 2007
			Below 854 m: sparse methane record (Brook et al., 2005)	500-800m: 8 melt layers identified (Gow and Meese, 2007)
			919 m: δ18Oatm control point used to extend chronology to 57ka with 2ka uncertainty (Brook et al. 2005), however δ18O profile may include flow induced artifacts (Faria et al., 2010)	Below 800m: Core quality degraded preculding identification of melt events (Gow and Meese, 2007)
				432 m: slight tilting of annual layers (Gow and Meese, 2007)
				559 - 800 m: intervals of inclined layering and reversed dips, occasionally exceeding 10° (Gow and Meese, 2007)
				780 m: steeply inclined layering (Gow and Meese, 2003)
				Below 800m: absence of layer structure (Gow and Meese, 2003)
				1002 - 1004 m: sediment entrained in ice (Gow and Meese, 2003)
WAIS	3405 m	Continuous (coring stopped 50m above bed (WAIS Divide Project Members, 2013))	Above 2850m: chronology based on annual layer counting (WAIS Divide Project Members, 2013)	2700 - 2900 m: multitrack electrical conductivity measurements (ECM) with pinched and discontinuous layers (Fudge et al., 2016)	Fitzpatrick et al., 2014
			Below 2850m: CH4 synchronization to NGRIP δ18O record and refined Hulu Cave speleothem δ18O record (Buizert et al., 2015)	2900 - 3100 m: Diffuse banding in ECM (Fudget et al., 2016)
				3150 and 3231.78 m: mm-scale disturbance in visual stratigraphy (Fitzpatrick et al., 2014)
SPICE	1751 m	Continuous through drilled depth (coring stopped 1000 m above bed (Casey et al. 2014))	Above 735 m: chronology based on annual layer counting and synchronization of volcanic sulfate peaks to WAIS Divide ice core (Fegyveresi et al., 2019)	306 m: undisturbed tephra layer (Fegyveresi et al., 2019)	Voigt, 2017
			Through 1751 m: chronology based synchronization of CH4 variations to WAIS Divide ice core (Epifanio et al., 2020)	Below 735 m: diffuse layering (Fegyveresi et al., 2019)
Talos Dome (TALDICE)	1620 m (175 m above bedrock)	1548 m (Crotti et al., 2021)	Above 1428m: TALDICE-1 chronology combines glaciological modelling to CH4 and d18Oatm records synchronization with dated ice cores (Crotti et al., 2021)	Above 1280 m: tephra layers are horizontal and undisturbed (Narcisi et al., 2017, Supplementary Figure 1)	Montagnat et al., 2012
			Between 1428 and 1548m: TALDICE-deep1 chronology based on new gas (d18Oatm, d15N and dO2/N2), ice (dD), and 81Kr measurements (Crotti et al., 2021)
			1548 - 1620 m: chemical signatures become quasi-flat, preventing interpretation of climate record (Crotti et al., 2021)
