# Supplementary material for: Advancing interpretation of incoherent scattering in ice penetrating radar data used for ice core site selection
Source: Copernicus journal article supplement (doi:10.5194/egusphere-2024-2450), 2024-09-02
Supplement: Supplementary file 8 [file SupplementaryTable_01_RadarProperties.xlsx]

## Sheet: Sheet1
Supplementary Table 1: Radar Image Metadata
Supporting Manuscript: Advancing interpretation of incoherent scattering in ice penetrating radar data used for ice core site selection
Authors: Ellen Mutter and Nicholas Holschuh
The table below contains metadata for the radar images presented in figures 1, 3, and 4 of the main text of this work.
Ice Core	Core Coordinates Source	Core Lat	Core Lon	Survey Date	Distance from Core Site (m)	File Name	Trace Index (10 km)	Radar System	Center Freq. (MHz)	Bandwidth (MHz)	Effective Range Resolution (m)	Radar System Reference
Camp Century	(Hansen and Langway, 1966)	77.1814	-61.1425	2014-05-07	3266	20140507_01_066	[2789:3332]	CReSIS MCoRDS 3 on P3	195	30	2.8	CReSIS. 2024. 2014 Greenland P3 Data.
DYE-3	(Langway et al., 1985)	65.1833	-43.8167	2014-04-12	2360	20140412_02_002	[304:955]	CReSIS MCoRDS 3 on P3	195	30	2.8	CReSIS. 2024. 2014 Greenland P3 Data.
GRIP (Figures 3, 4, S4)	(Johnsen et al., 1992)	72.5667	-37.6167	2012-04-11	1378	20120411_02_051	[507:842]	CReSIS MCoRDS 3 on P3	195	30	2.8	CReSIS. 2024. 2012 Greenland P3 Data.
GRIP (Figure 1c, ~5m)	(Johnsen et al., 1992)	72.5667	-37.6167	2002-05-30	2204	20020530_01_013	[451:516]	CReSIS ICORDS 2	158.5	17	5	CReSIS. 2024. 2002 Greenland P3 Data.
GRIP (Figure 1c, ~50m)	(Johnsen et al., 1992)	72.5667	-37.6167	1987	unknown	N375	n/a	TUD 60MHz	60	~1.7*	~50*	Wright et al., 1989; Hodge et al., 1990
GISP2	(Morrison, 1989)	72.5798	-38.4518	2014-04-10	1636	20140410_01_038 - 039	[2833:3512]	CReSIS MCoRDS 3 on P3	195	30	2.8	CReSIS. 2024. 2014 Greenland P3 Data.
NGRIP	(Dahl-Jensen et al., 2002)	75.1	-42.32	2014-05-02	2075	20140502_01_047	[2096:2771]	CReSIS MCoRDS 3 on P3	195	30	2.8	CReSIS. 2024. 2014 Greenland P3 Data.
NEEM	(NEEM Community Members, 2013)	77.45	-51.06	2008-08-12	473	20080812_03_013	[76:579]	CReSIS Ground MCRDS at NEEM	150	30	2.8	CReSIS. 2024. 2008 Greenland Ground Data.
Byrd	(Gow et al., 1968)	-80.0167	-119.517	2010-01-16	3284	20100116_02_011	[973:1528]	CReSIS MCoRDS 3 on P3	193.9	9.5	8.9	CReSIS. 2024. 2010 Antarctica DC8 Data.
Vostok	(Vasiliev et al., 2007)	-78.4667	106.8	2013-11-27	855	20131127_01_045 - 046	[1403:2703]	CReSIS MCoRDS 3 on P3	195	30	2.8	CReSIS. 2024. 2013 Antarctica P3 Data.
Siple	(Engelhardt, 2004)	-81.658	-148.809	2013-12-20	3255	20131220_02_002	[2184:2875]	CReSIS MCoRDS 4 on Polar6	325	250	0.3	CReSIS. 2024. 2013 Antarctica Basler Data.
Dome C	(Faria et al., 2018)	-75.1011	123.348	2019-12-01	1030	ldc_to_edc	[0:1023]	BELDC VHF Radar from U Alabama (Yan et al., 2020)	200	60	1.4	Lilien et al., 2021
EDML	(Faria et al., 2018)	-75.0017	0.0677778	2002-03-01	100	AWI_Kohnen-Dome_Fuji_stp10	[218:346]	2002 AWI RES System on Polar2	150	20	4.2	Steinhage et al., 2013; Nixdorf et al., 1999
Dome Fuji	(Dome Fuji Ice Core Project Members, 2017)	-77.3169	39.7033	2018-12-01	59	20181231_01_001, 20190102_02_001	[7401:9080] (of the combined images)	CReSIS_Ground	200	60	1.4	Wang et al., 2023
WAIS	(WAIS Divide Project Members, 2013)	-79.4676	-112.086	2006-01-03	972	20060103_01_001	[134:499]	CReSIS SAR	210	180	0.5	CReSIS. 2024. 2005 Antarctica Ground Data.
SPICE	(Casey et al., 2014; Fegyveresi et al., 2019)	-89.99	-98.16	2016-01-13	519	P34	[579:880]	PolarGap PASIN on TO	150	12	7	Ferraccioli, F., et al., 2021b
Taylor Dome	(Grootes et al., 1994)	-77.795	158.718	1994/1995	n/a**	n/a**	n/a**	Weertman and Chin Radar System (Watts and Wright, 1981)	7.5	7.5	11.2	Morse, 1997
Talos Dome	(Urbini et al., 2006)	-72.8278	159.183	2005/2006	6	W18	[254:861]	WISE-ISODYNE PASIN	150	10	8.4	Ferraccioli, F., et al., 2021a
*Hodge et al., 1990 cite a bandwidth of 4 MHz. While there is some frequency content in the posted radar images at 4 MHz, Fourier analysis of radar transect indicates a dominant signal from 1-2 MHz bandwidth, with an ~50m effective range resolution.
**Original data lost (Waddington, Personal Communication, 2023), radargrams are digitized from Morse, 1997 Figure 2.5
